# Supplementary material for: Synthesis and α-Glucosidase Inhibition Activity of 2-[3-(Benzoyl/4-bromobenzoyl)-4-hydroxy-1,1-dioxido-2H-benzo[e][1,2]thiazin-2-yl]-N-arylacetamides: An In Silico and Biochemical Approach
Source: MDPI journal article supplement (doi:10.3390/molecules26103043), 2021-05-20

Supplementary Materials

# Synthesis and $\alpha$ -Glucosidase Inhibition Activity of 2-[3-(Benzoyl/4-bromobenzoyl)-4-hydroxy-1,1-dioxido-2H-benzo[e][1,2]thiazin-2-yl]-N-arylacetamides: An *In Silico* and Biochemical Approach

Furqan Ahmad Saddique, Sana Aslam, Matloob Ahmad \*, Usman Ali Ashfaq, Muhammad Muddassar, Sadia Sultan, Saman Taj, Muzammil Hussain, Dae Sung Lee and Magdi E. A. Zaki \*

(Supplementary Data File)

$^1\text{H}$  NMR,  $^{13}\text{C}$  NMR and MS Spectra of potent compounds

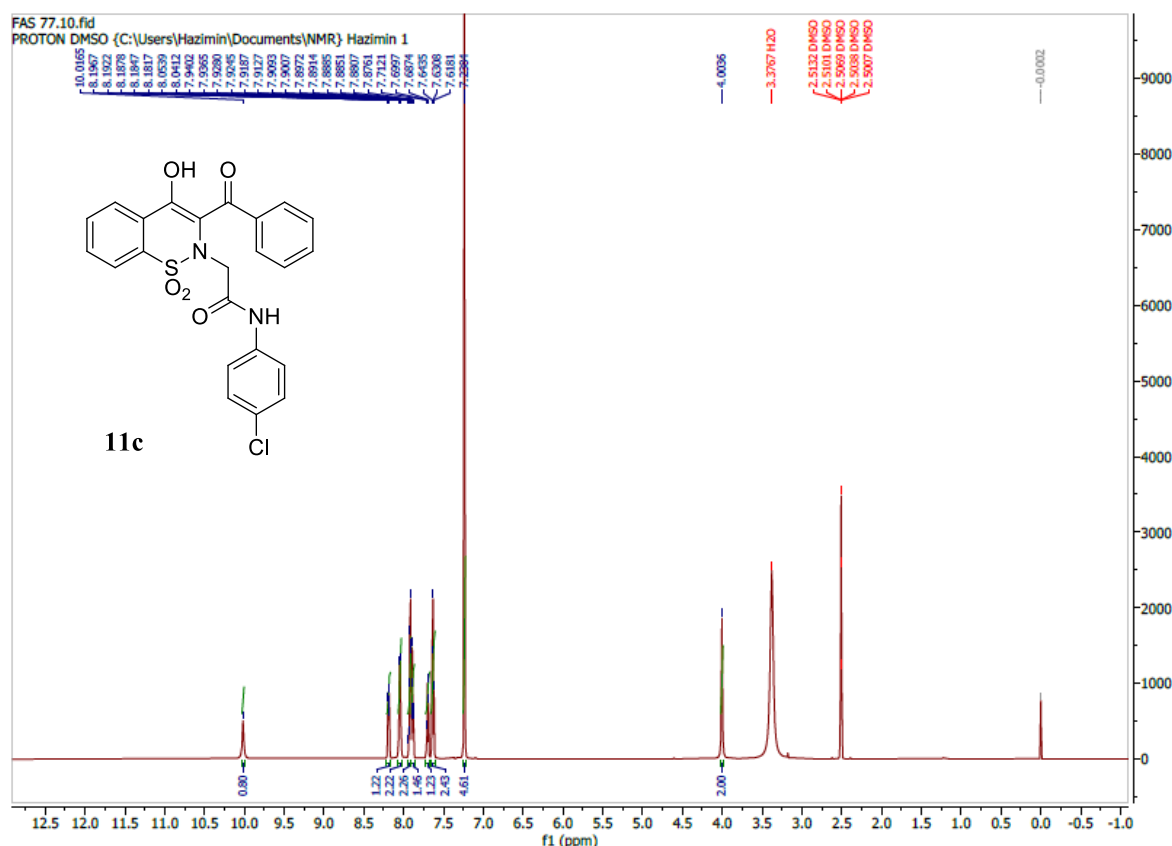

$^1\text{H}$  NMR Spectrum of compound **11c**.

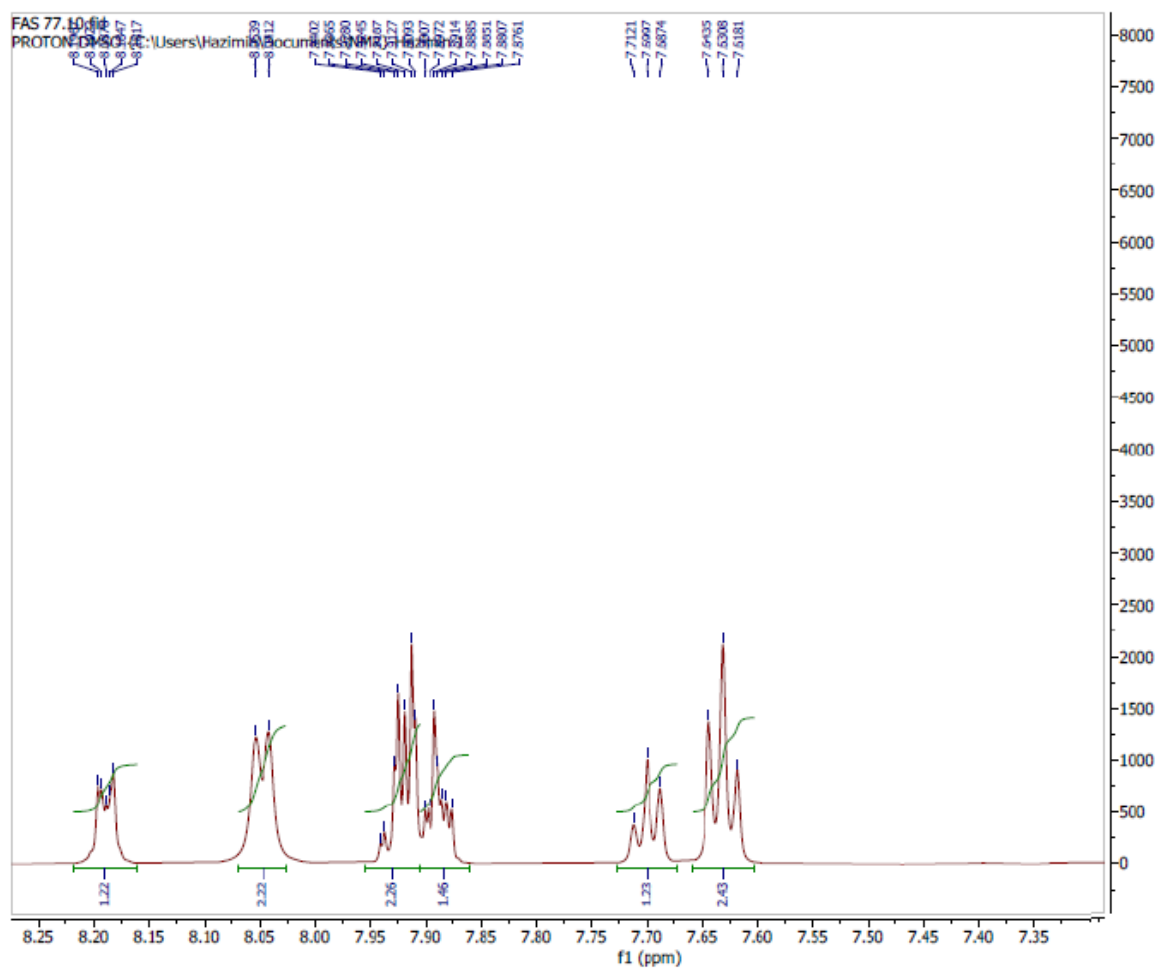

Expanded form of  $^1\text{H}$  NMR Spectrum of compound **11c** (region 7.60-8.25 ppm).

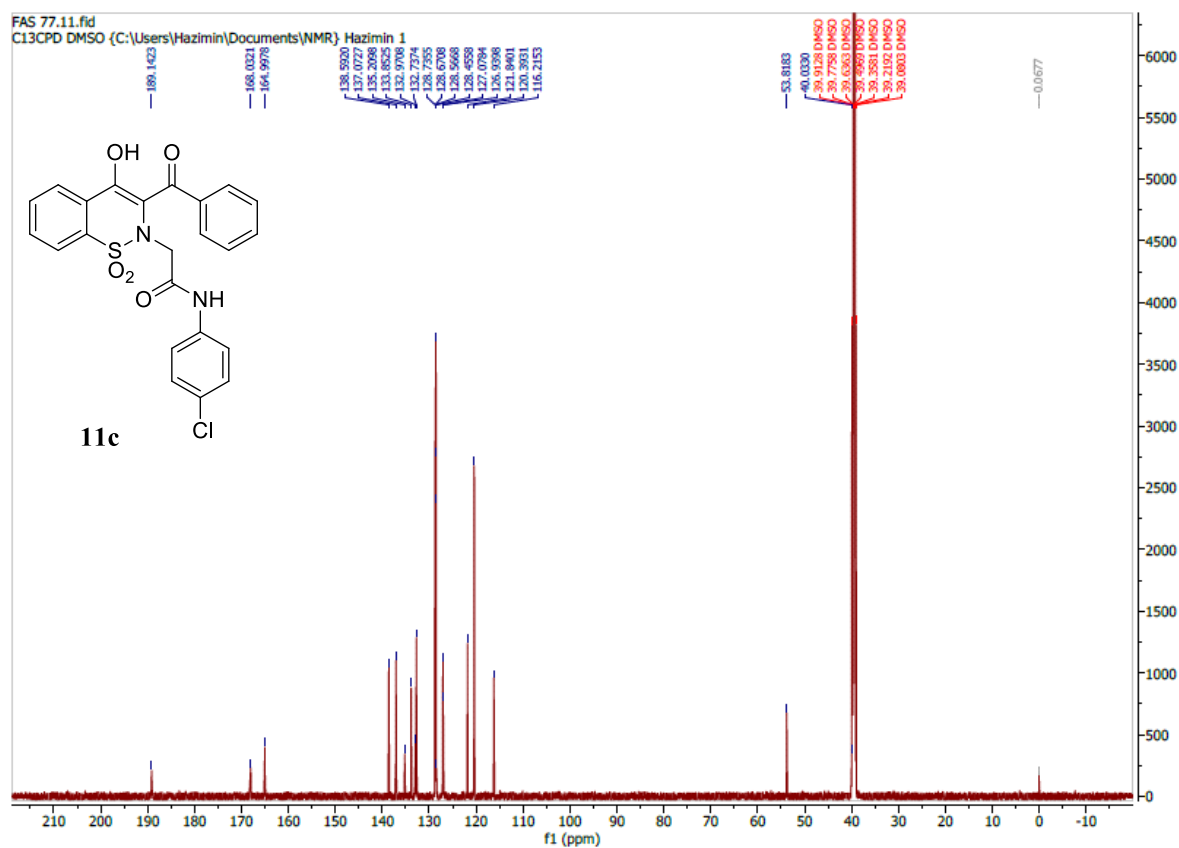

$^{13}\text{C}$  NMR Spectrum of compound **11c**.

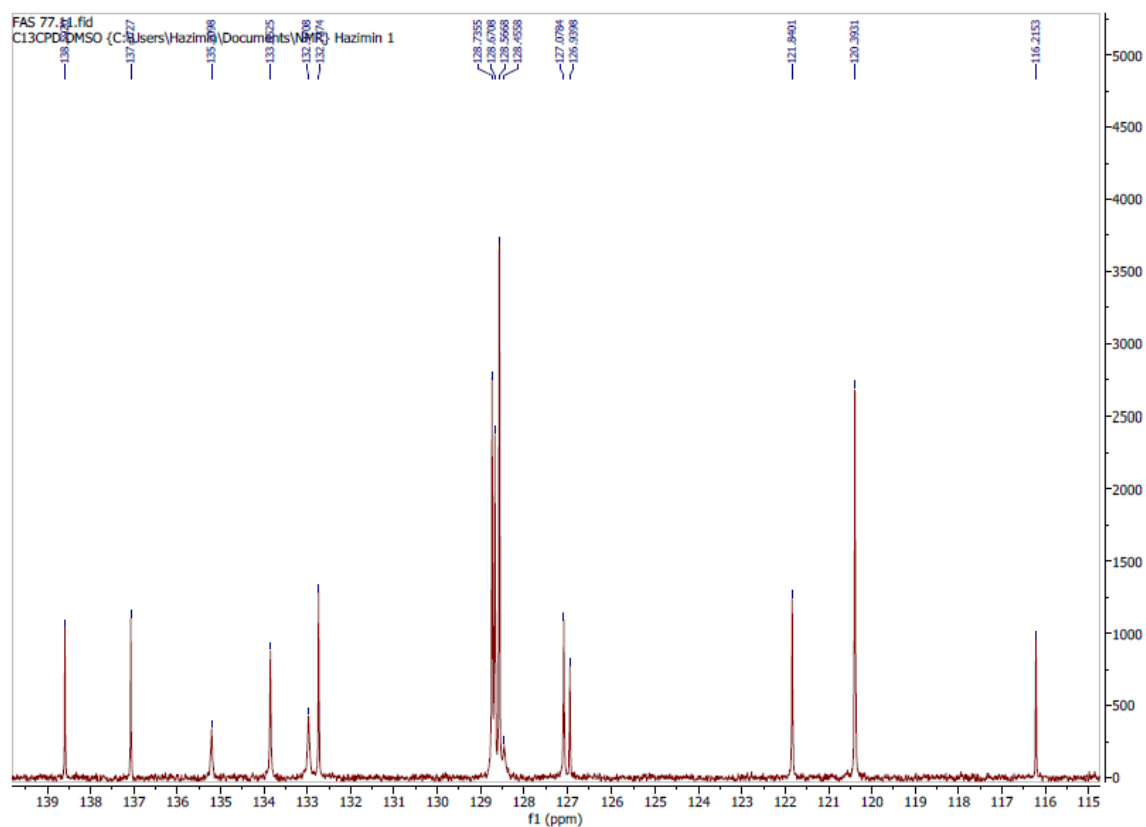

Expanded form of  $^{13}\text{C}$  NMR Spectrum of compound **11c** (region 116-139 ppm).

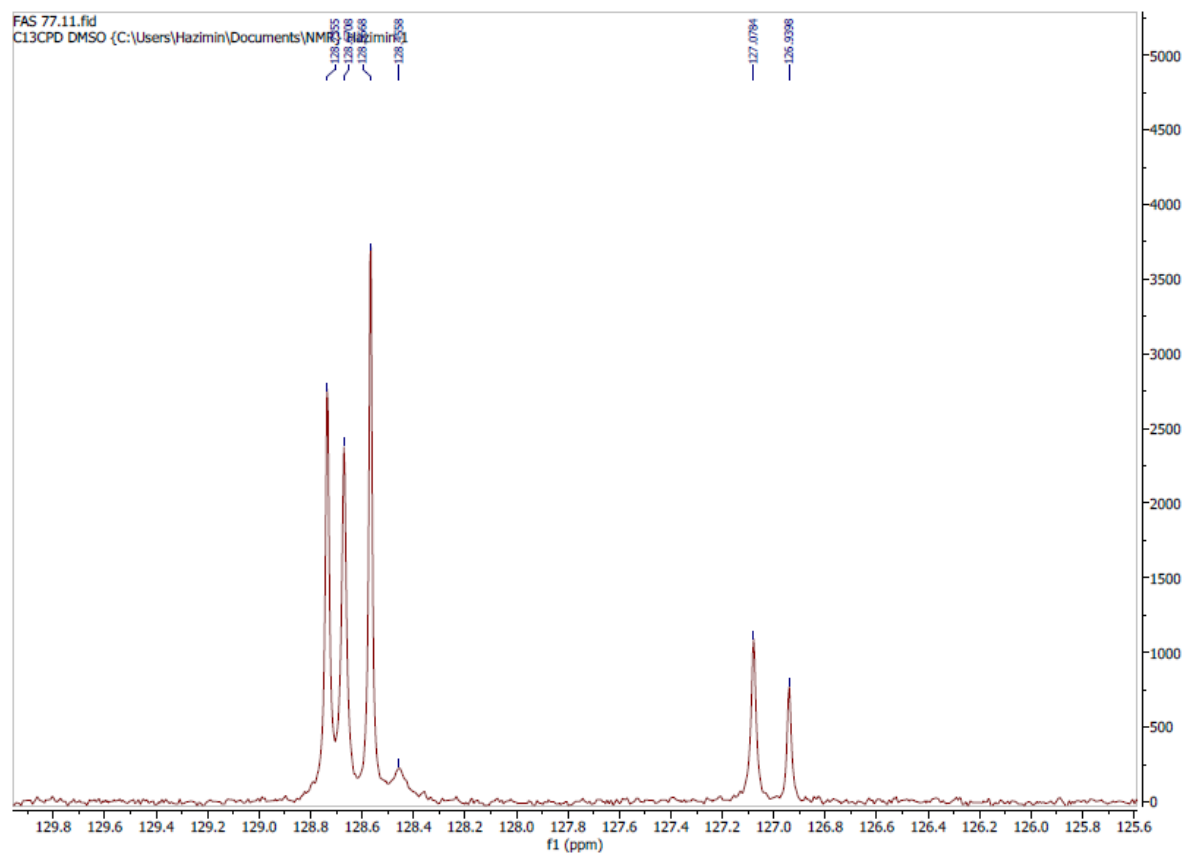

Expanded form of  $^{13}\text{C}$  NMR Spectrum of compound **11c** (region 126.8-129.0 ppm).

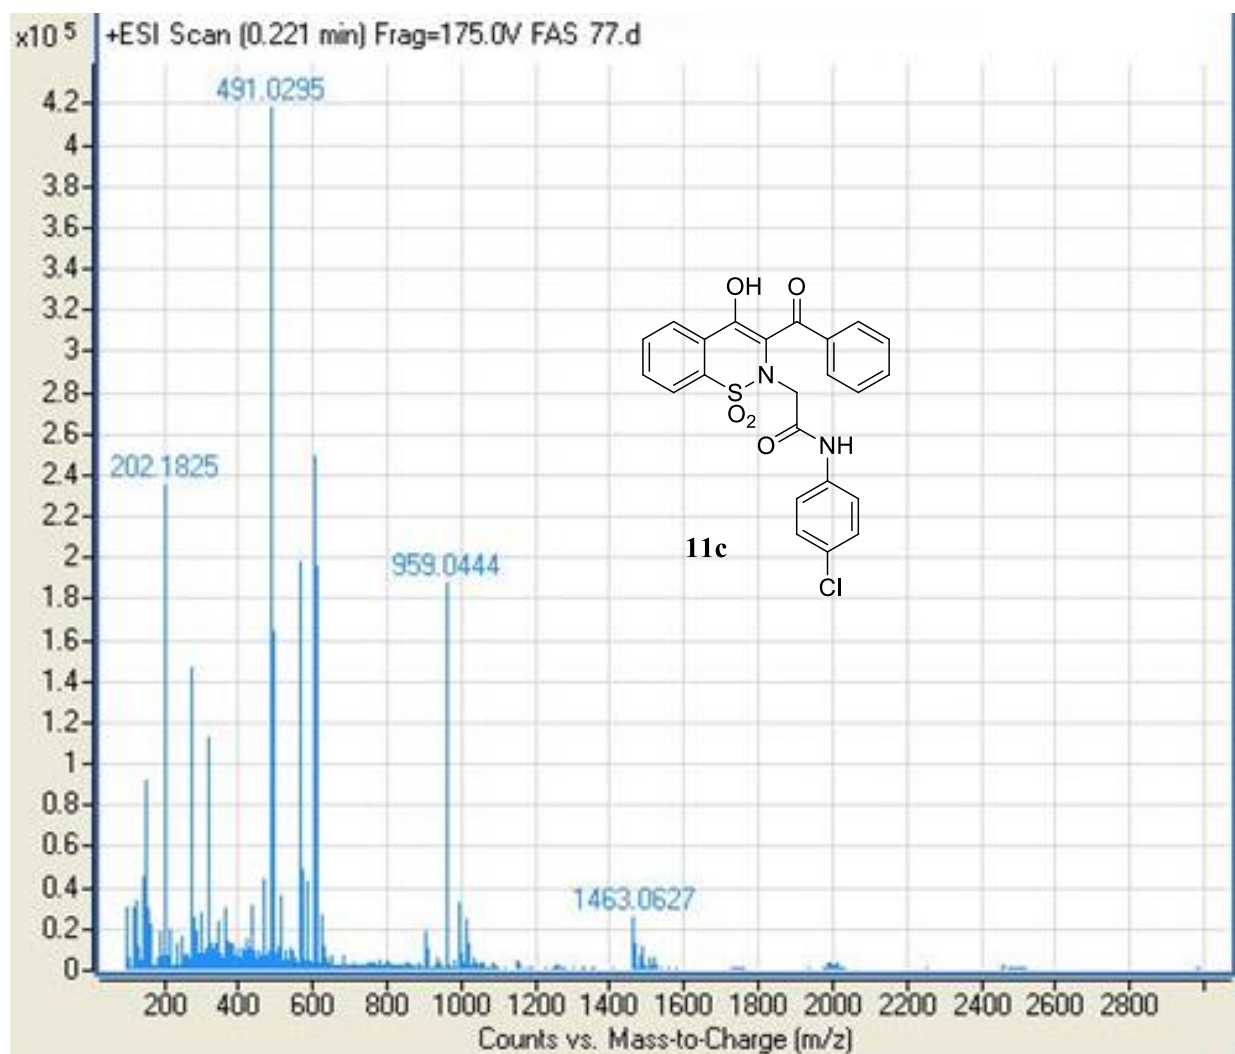

MS Spectrum of compound **11c**.

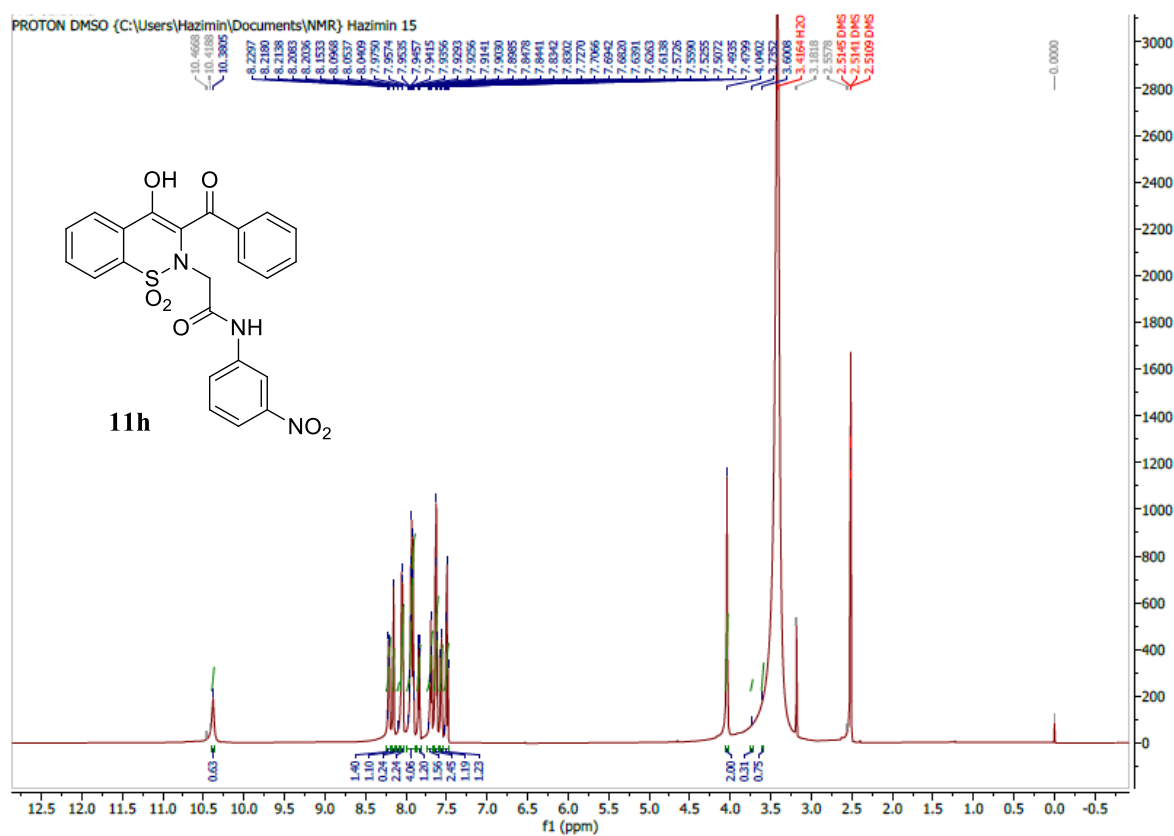

$^1\text{H}$  NMR

Spectrum of compound **11h**.

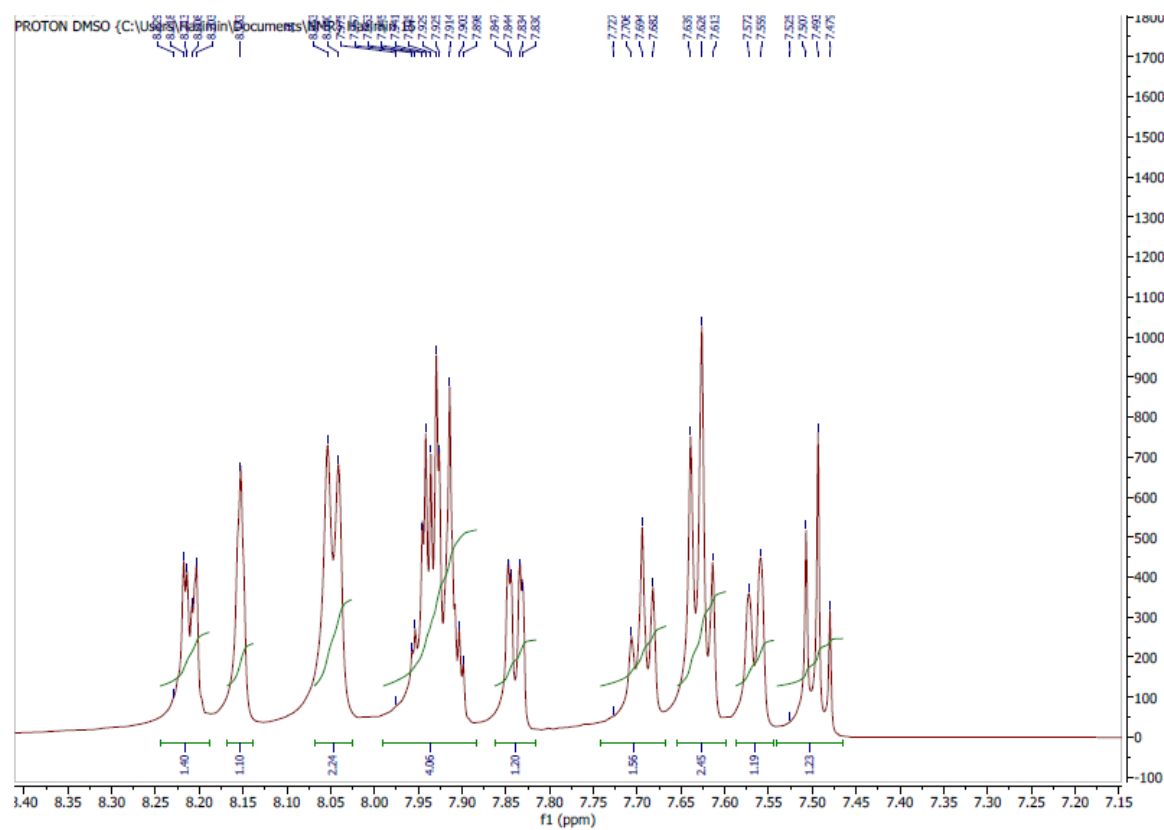

Expanded form of  $^1\text{H}$  NMR Spectrum of compound **11h** (region 7.45-8.25 ppm).

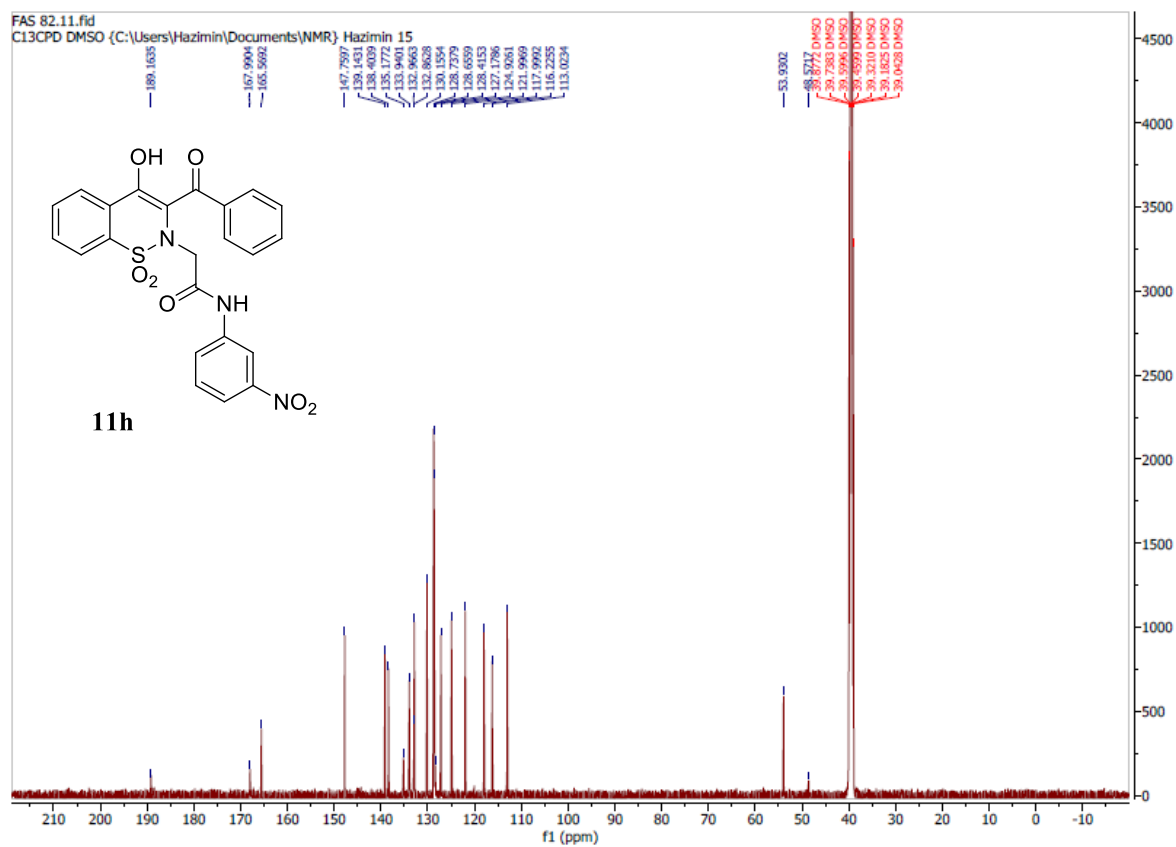

<sup>13</sup>C NMR Spectrum of compound **11h**.

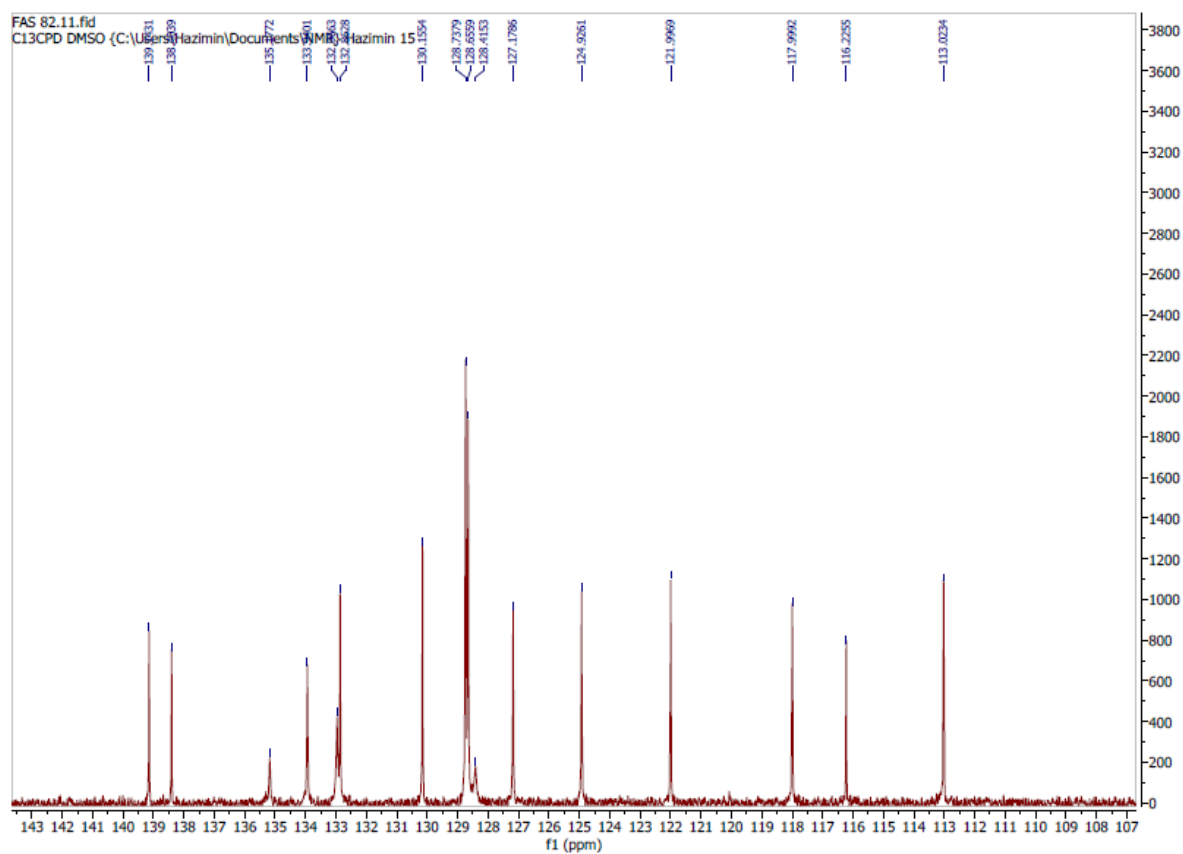

Expanded form of  $^{13}\text{C}$  NMR Spectrum of compound **11h** (region 113-140 ppm).



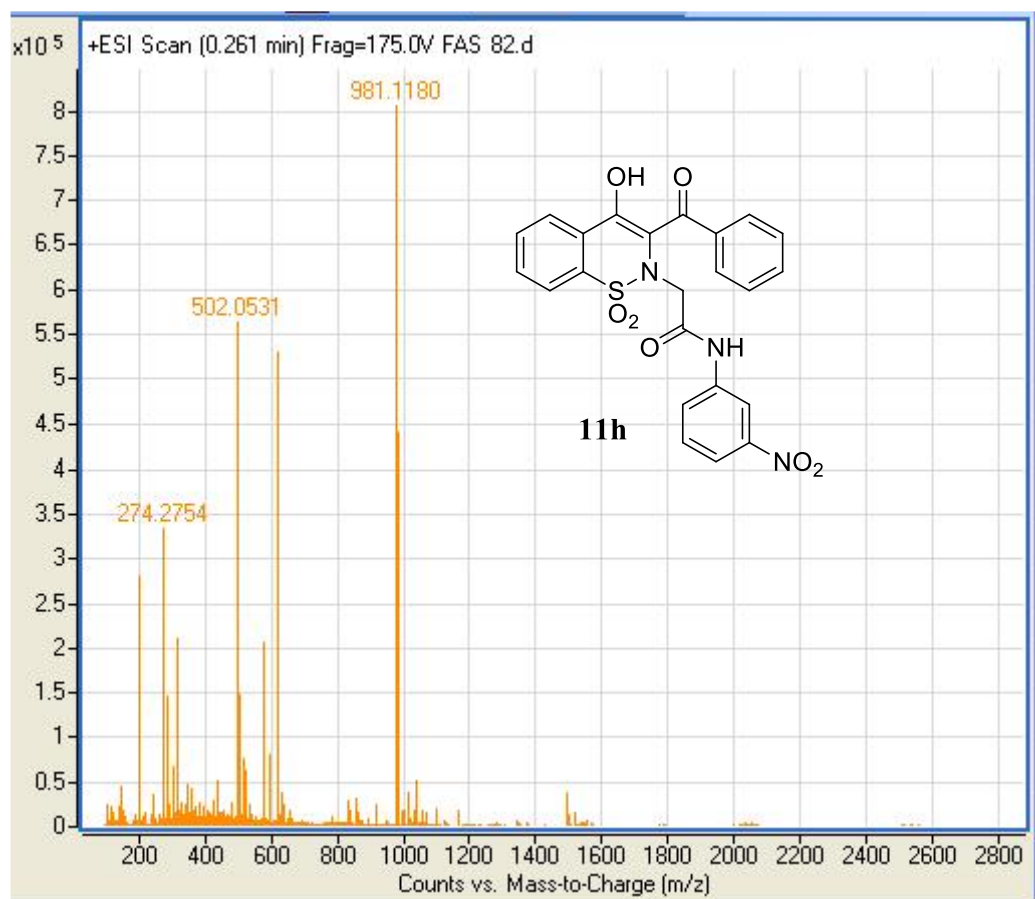

MS Spectrum of compound **11h**.



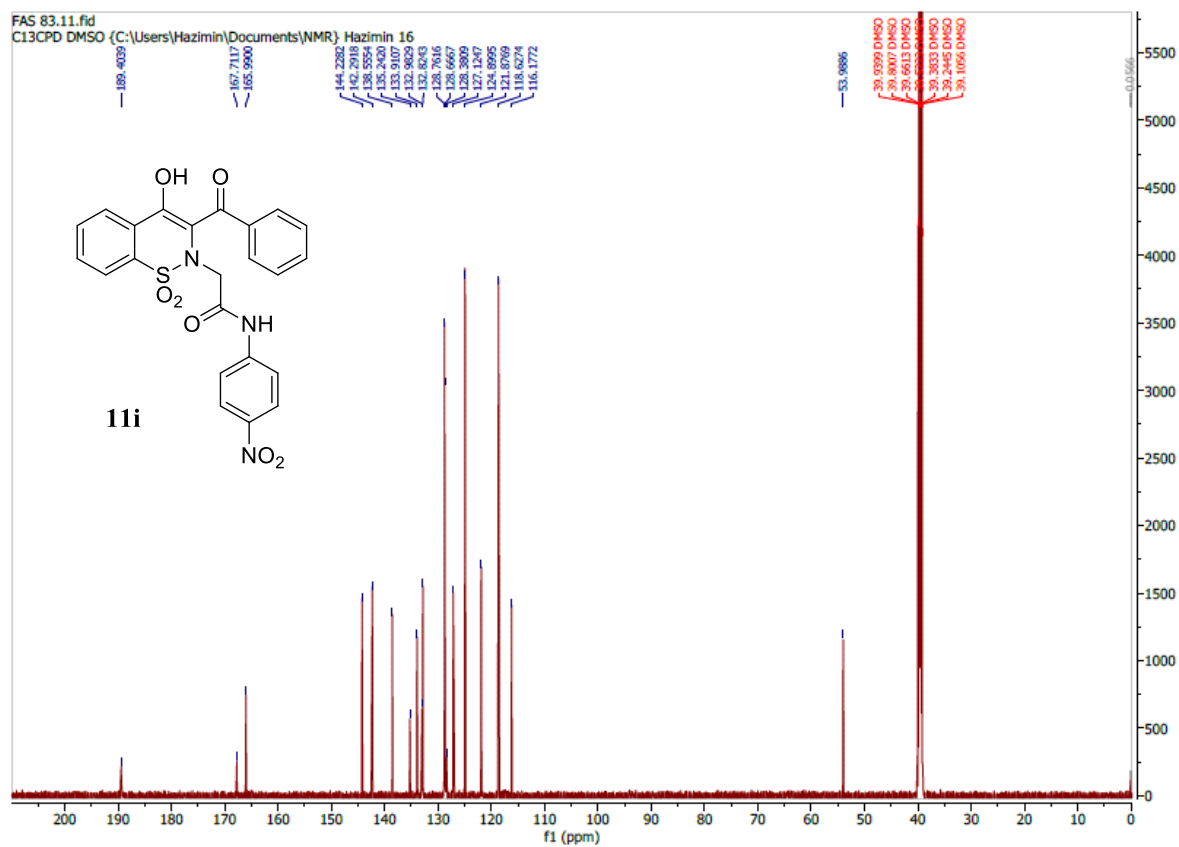

<sup>13</sup>C NMR

Spectrum of compound **11i**.

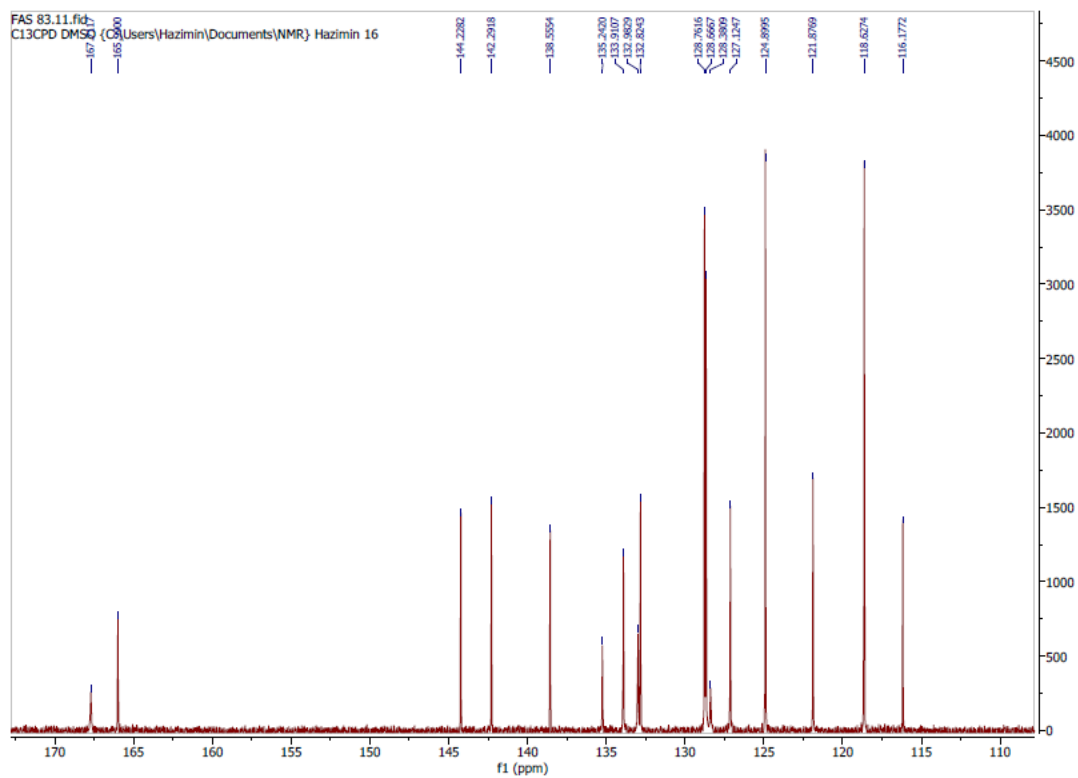

Expanded form of <sup>13</sup>C NMR Spectrum of compound **11i** (region 115-145 ppm).

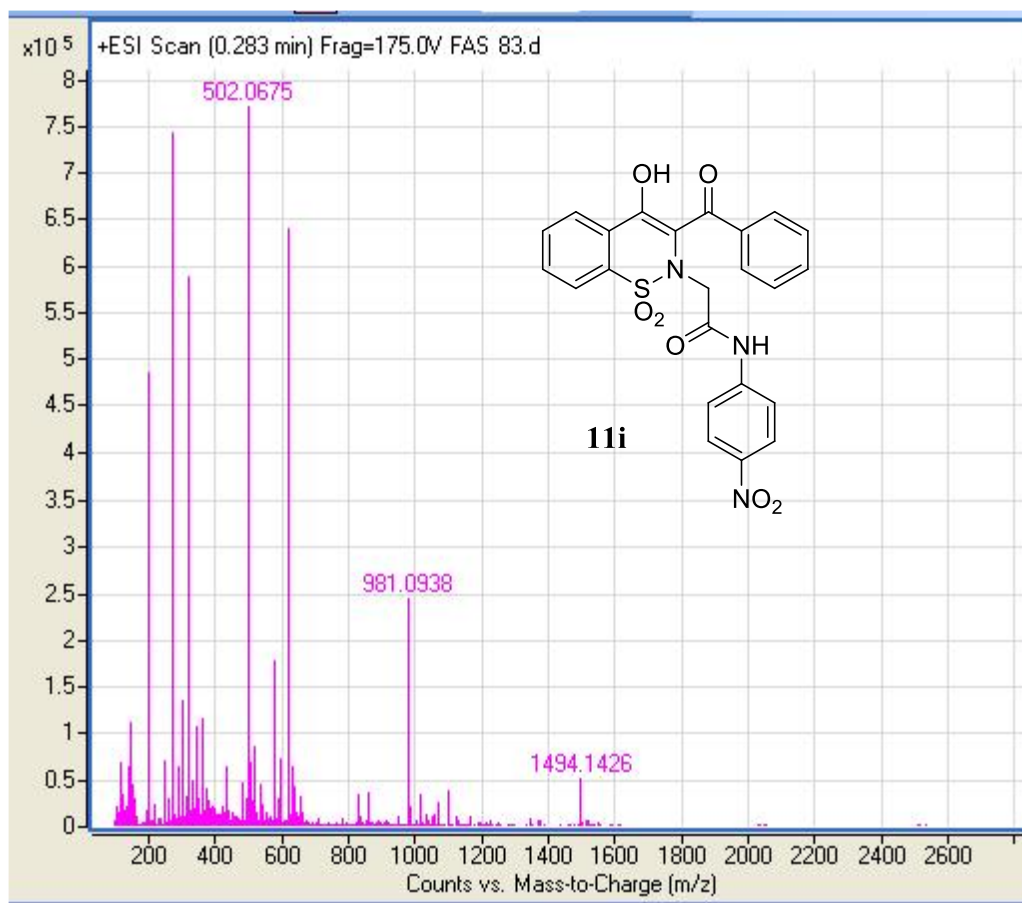

MS Spectrum of compound **11i**.

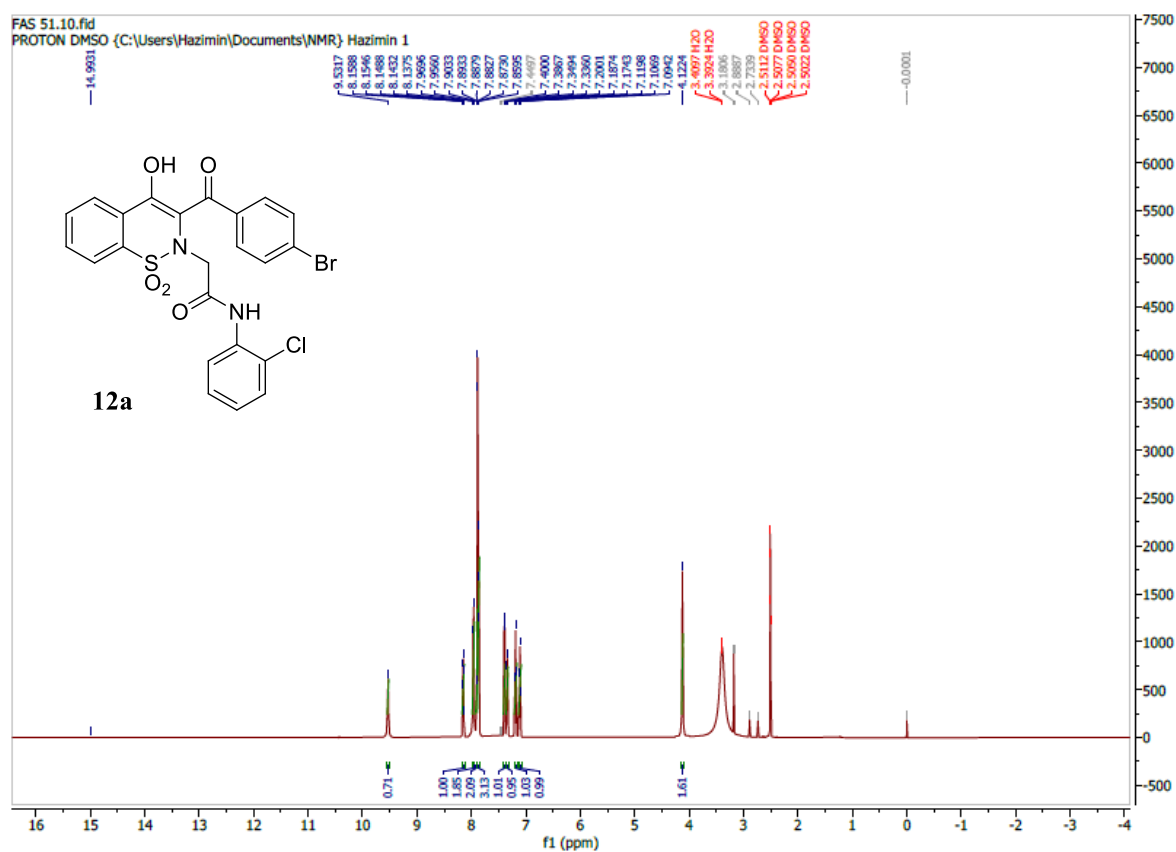

$^1\text{H}$  NMR Spectrum of compound **12a**.

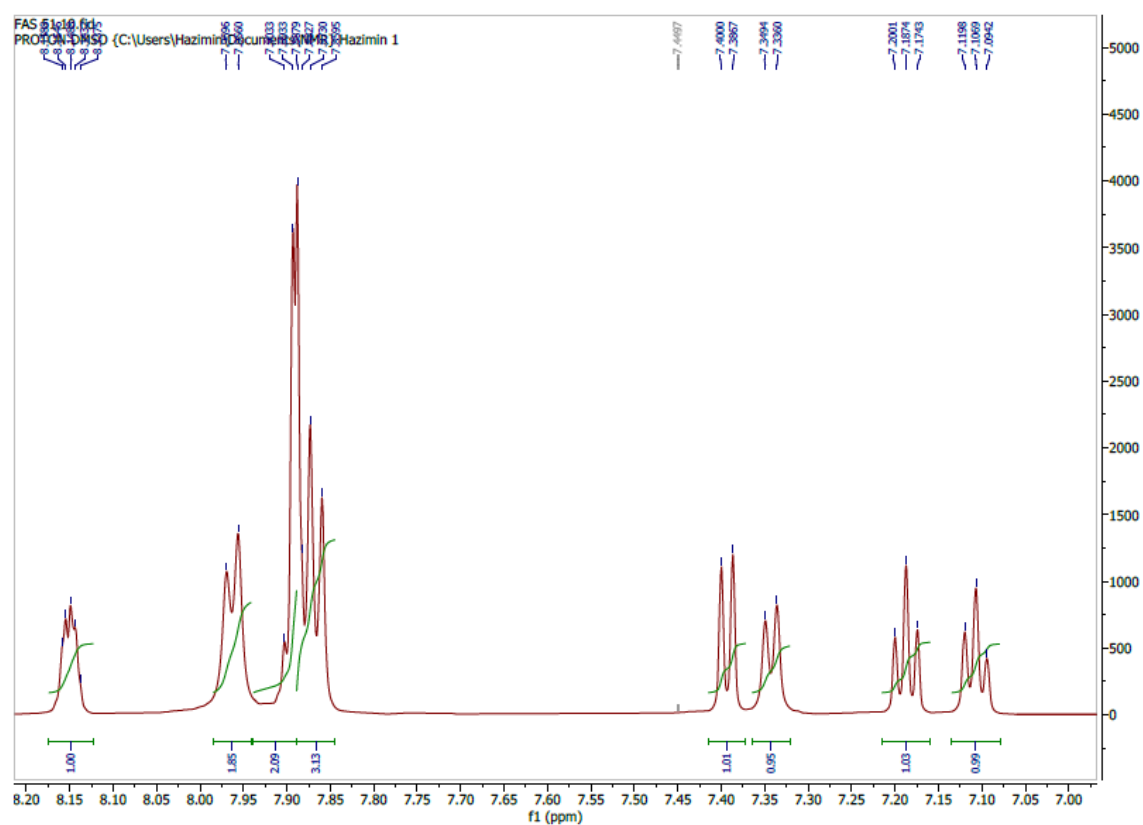

Expanded form of  $^1\text{H}$  NMR Spectrum of compound **12a** (region 7.05-8.20 ppm).

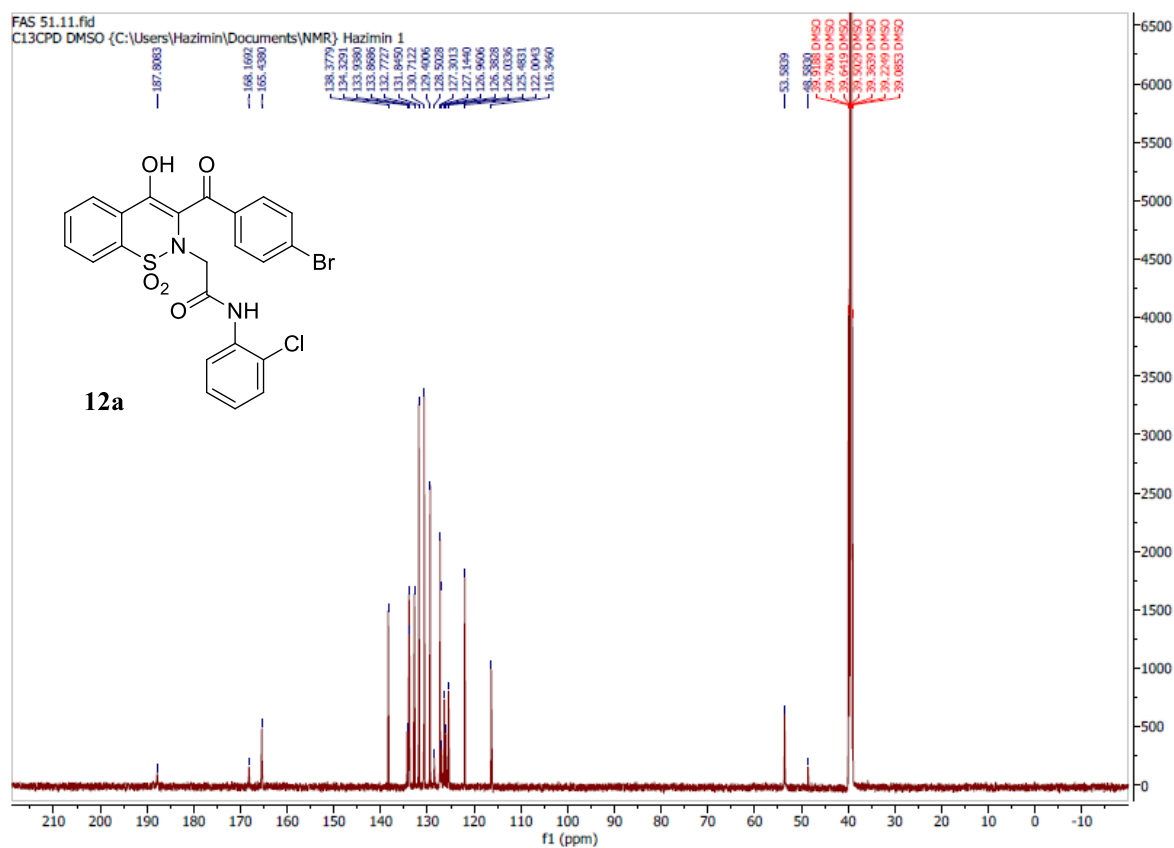

$^{13}\text{C}$  NMR Spectrum of compound **12a**.

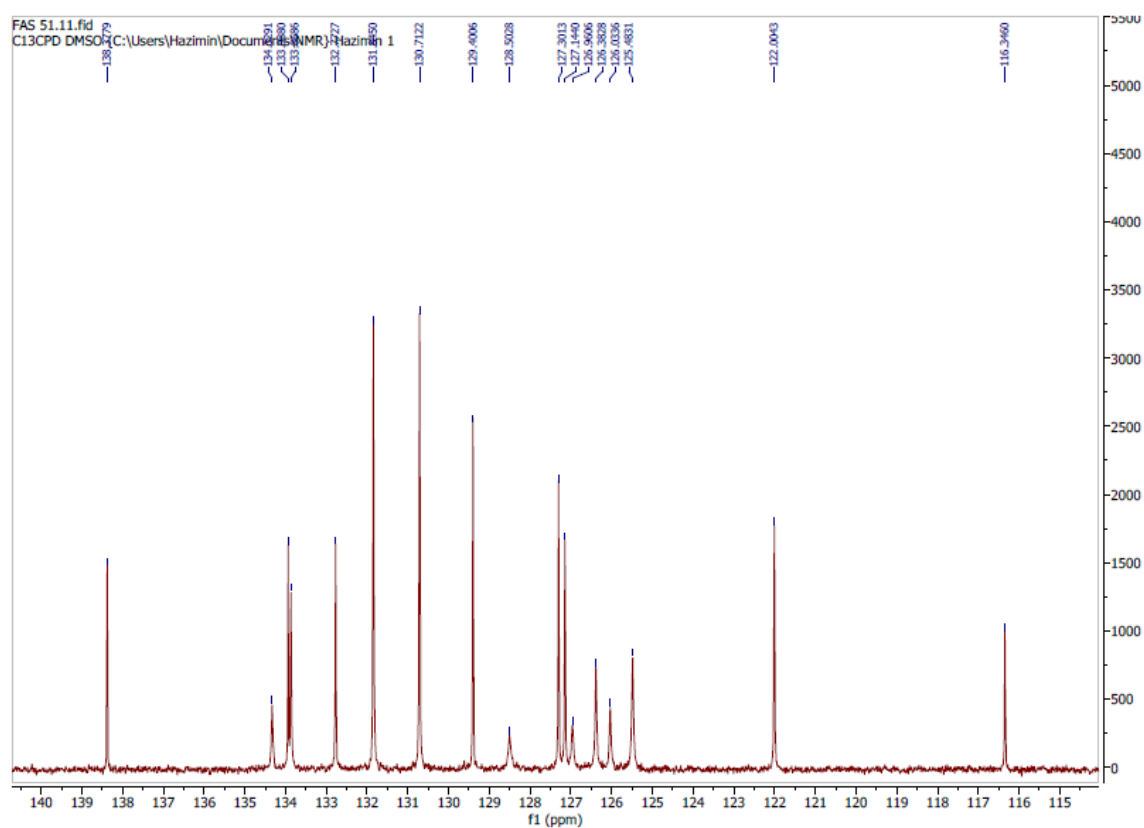

Expanded form of  $^{13}\text{C}$  NMR Spectrum of compound **12a** (region 116-139 ppm).

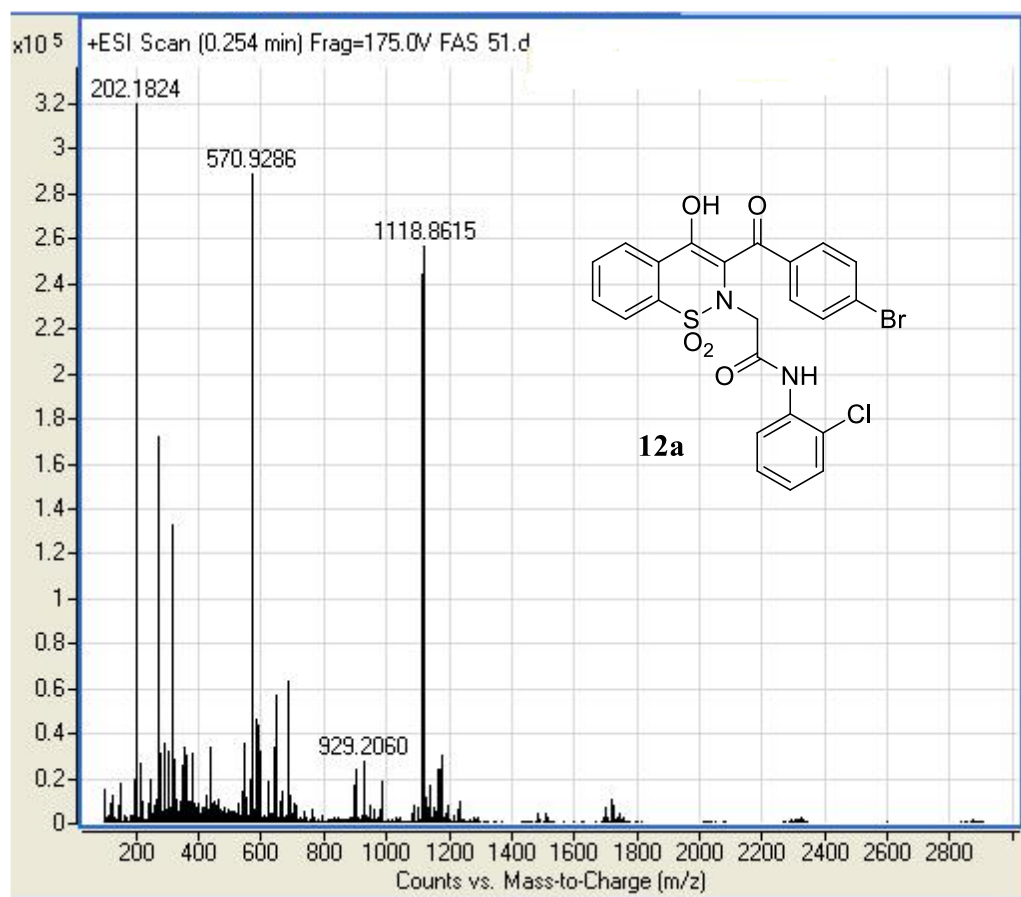

MS Spectrum of compound **12a**.

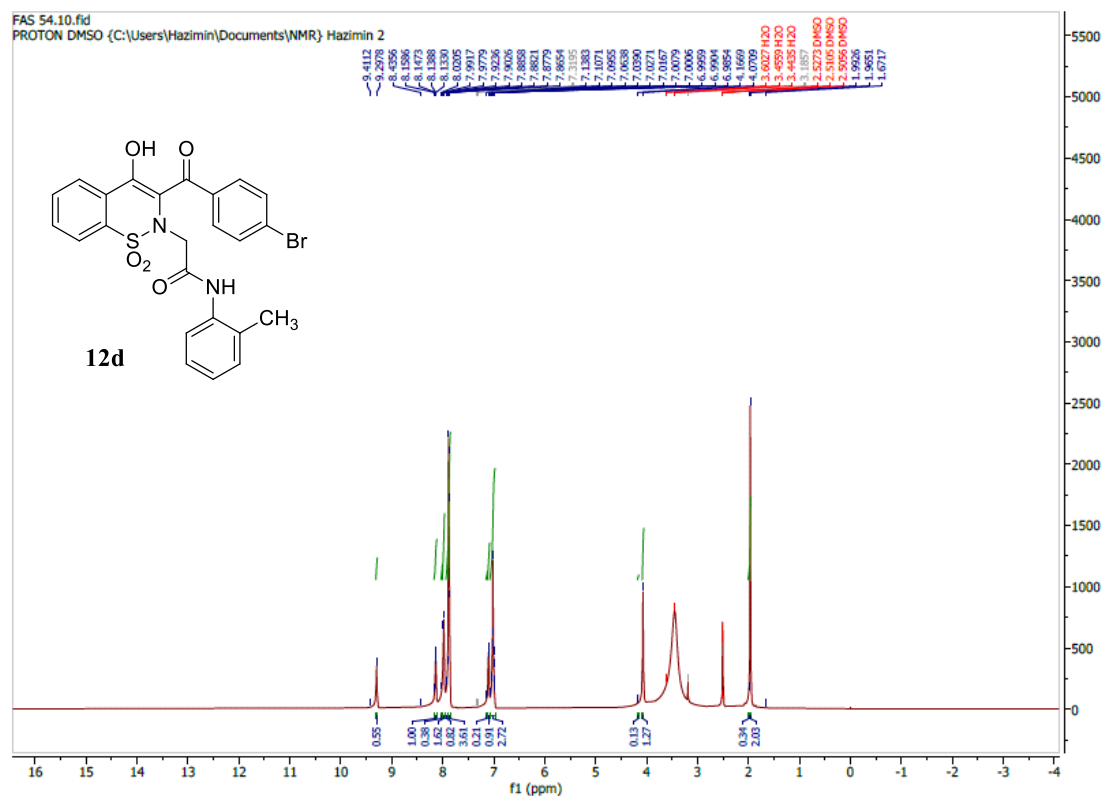

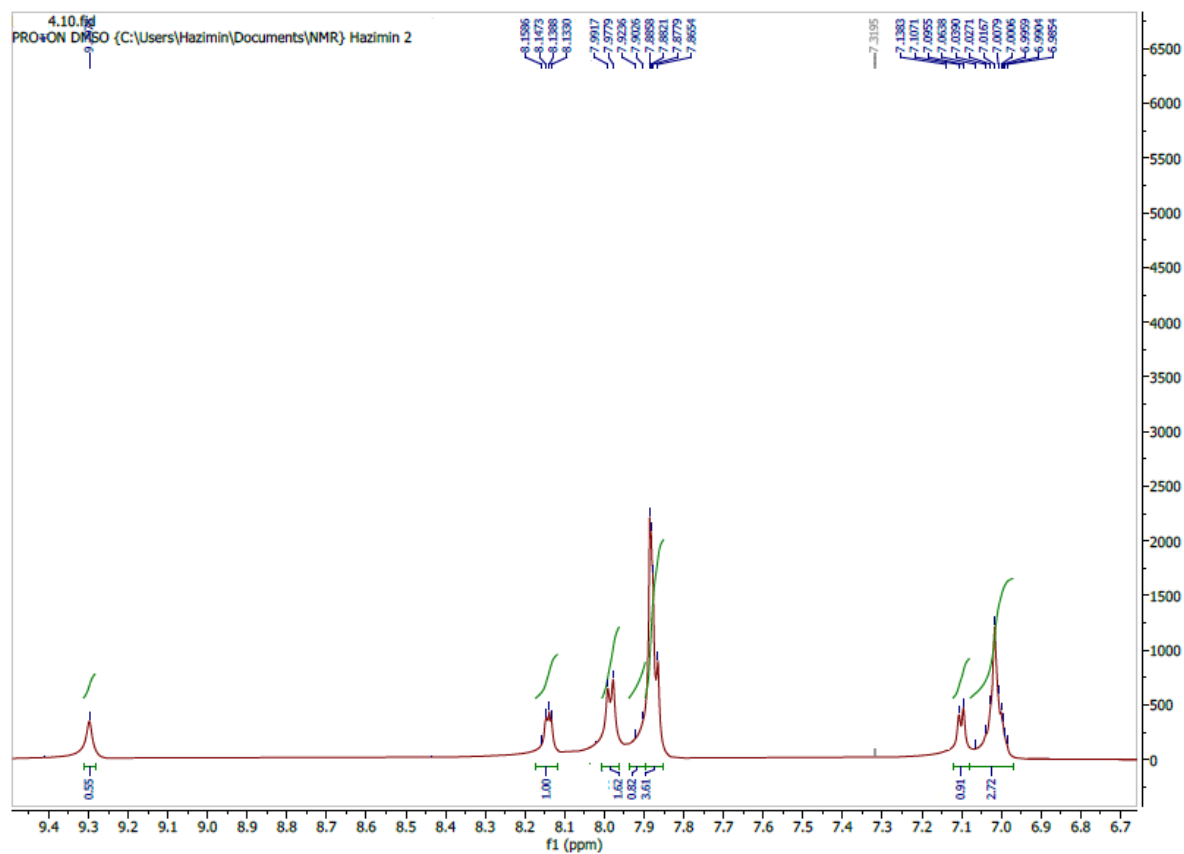

Expanded form of  $^1\text{H}$  NMR Spectrum of compound **12d** (region 6.90-8.20 ppm).

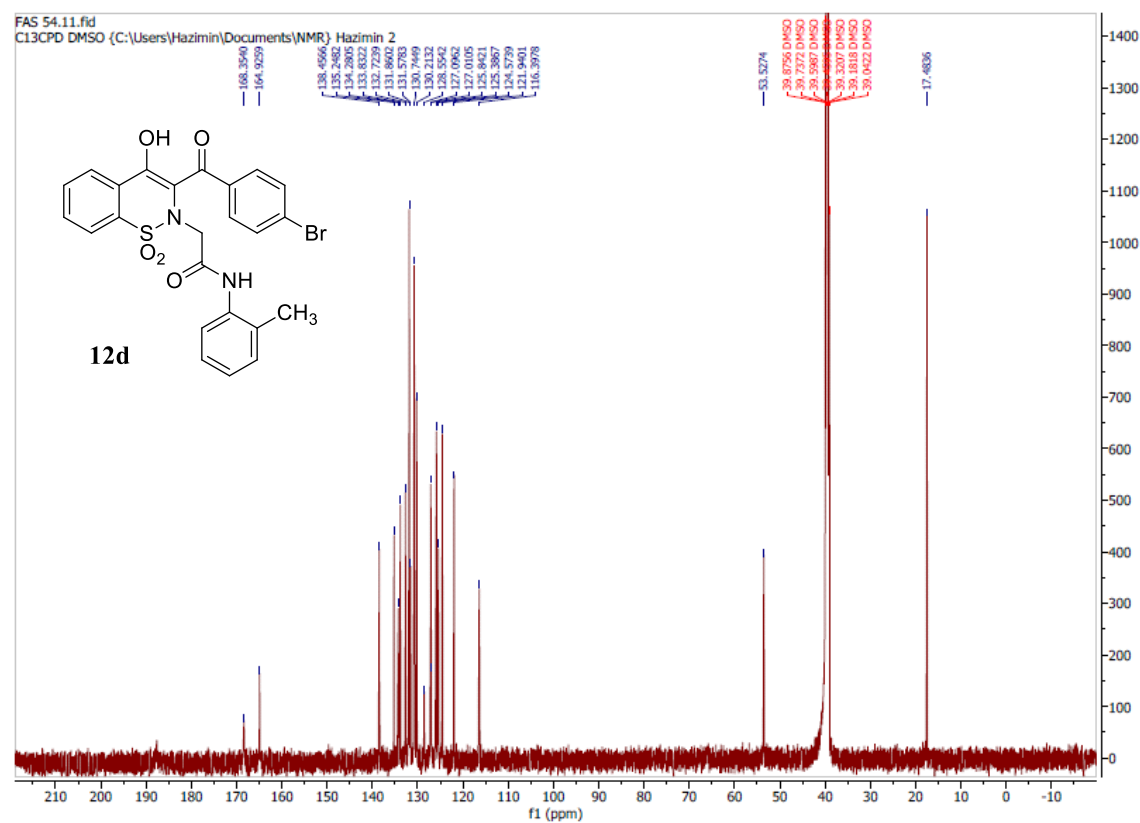

$^{13}\text{C}$  NMR Spectrum of compound **12d**.



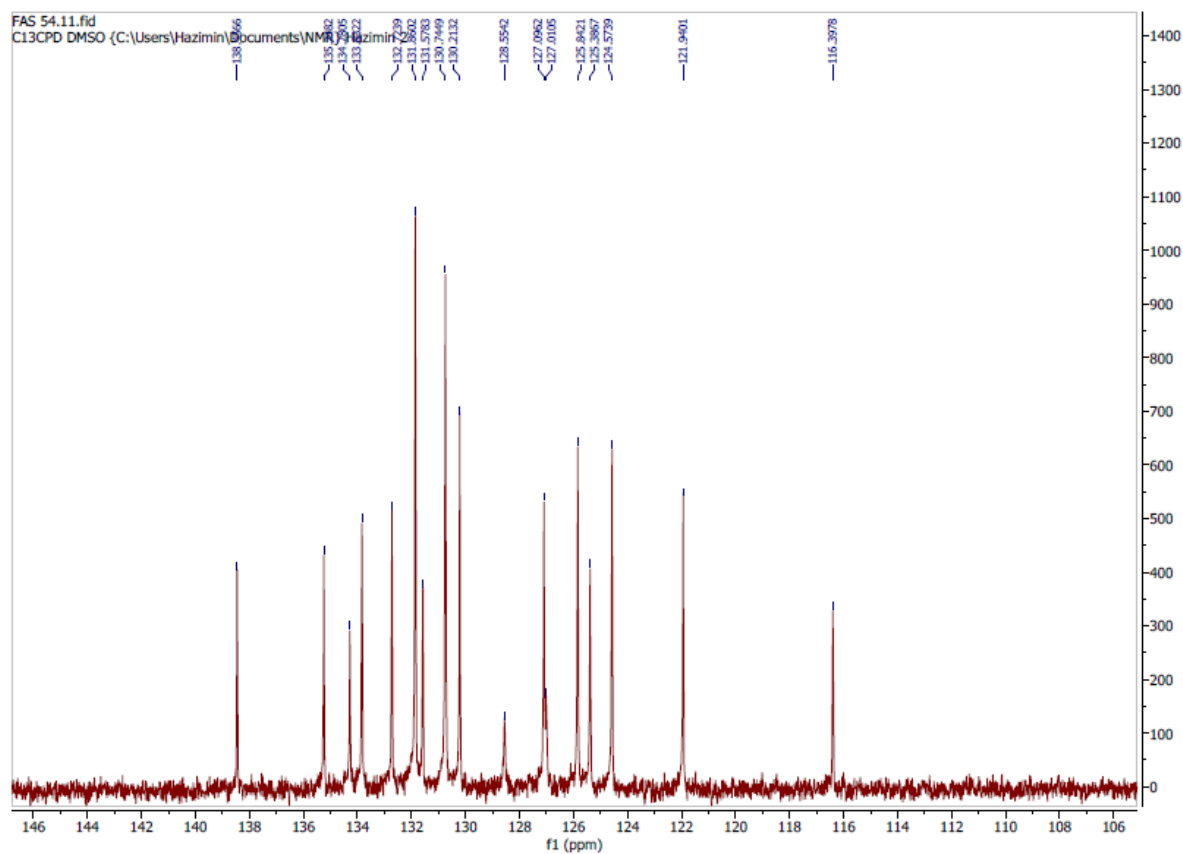

Expanded form of  $^{13}\text{C}$  NMR Spectrum of compound **12d** (region 116-140 ppm).

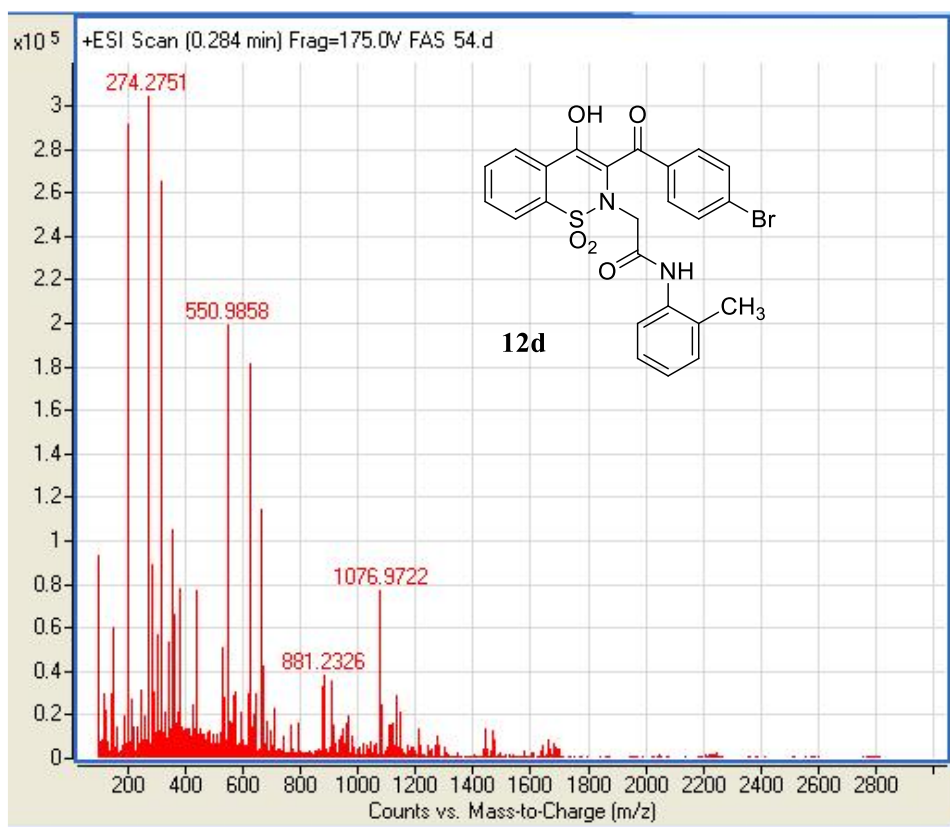

MS Spectrum of compound **12d**.

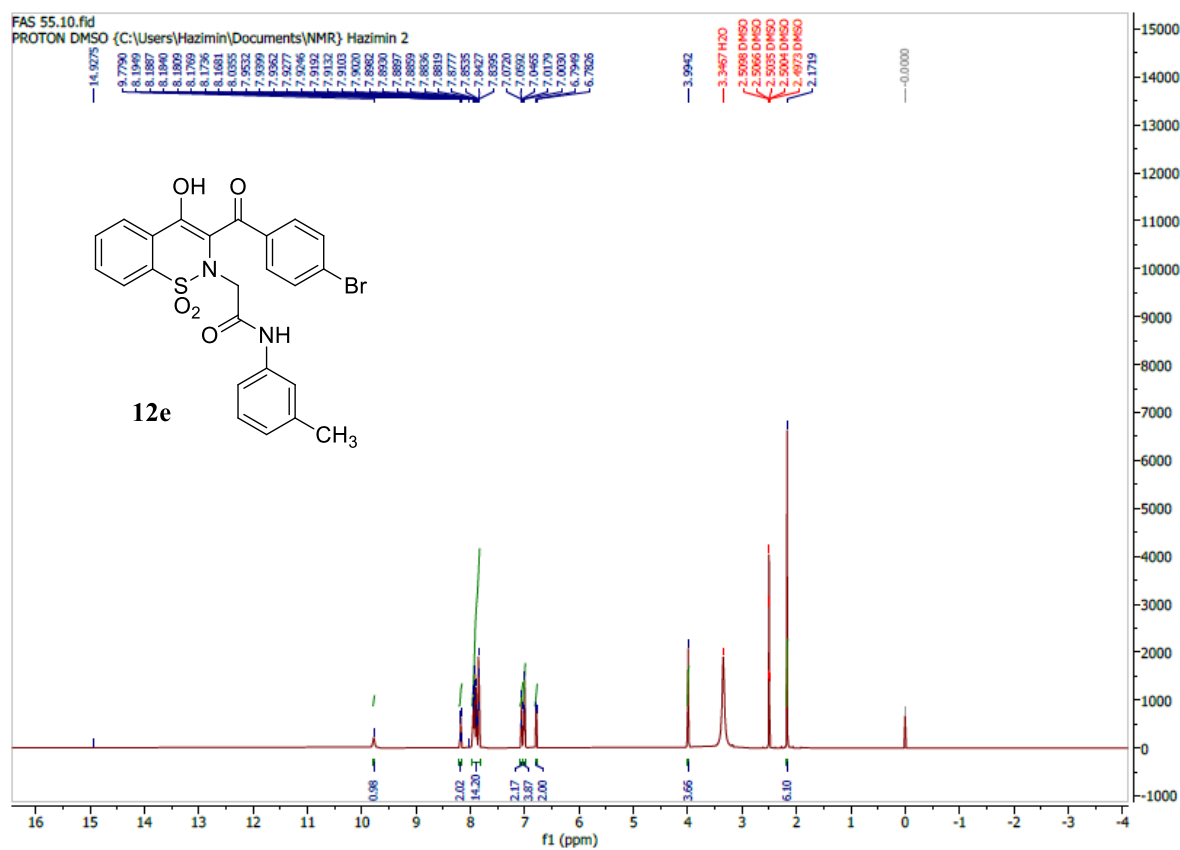

$^1\text{H}$  NMR Spectrum of compound **12e**.

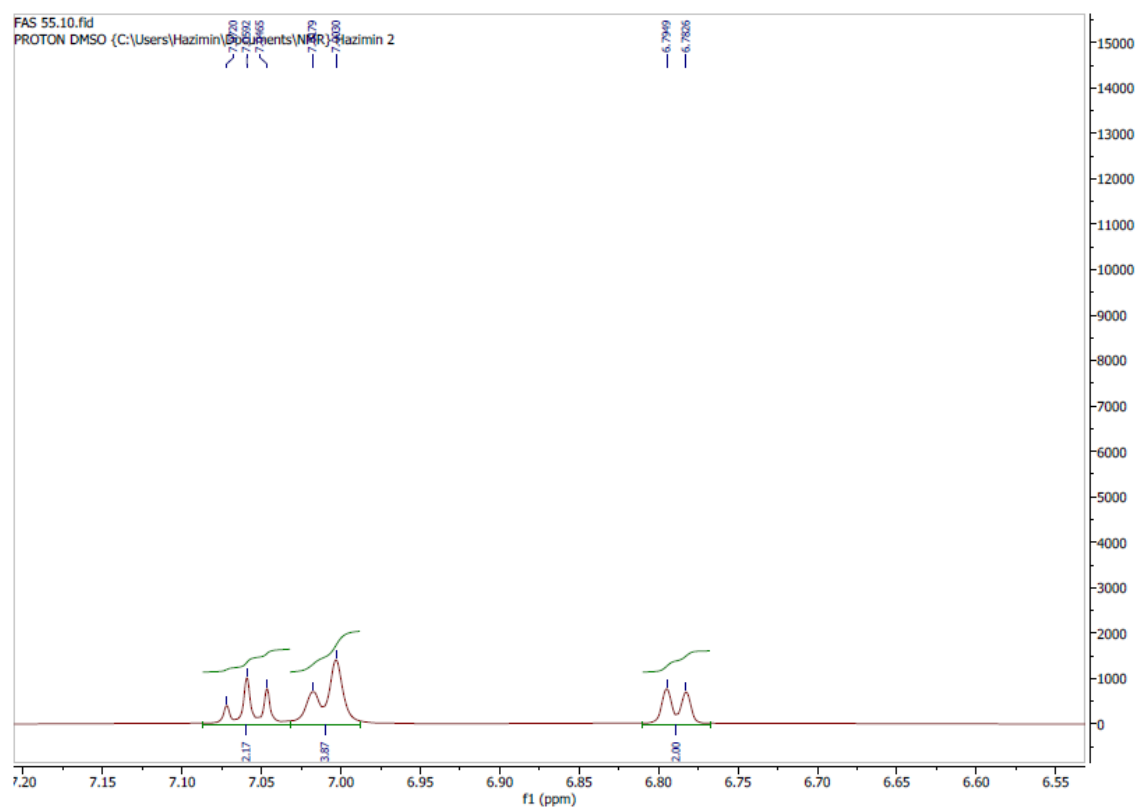

Expanded form of  $^1\text{H}$  NMR Spectrum of compound **12e** (region 6.75-7.10 ppm).

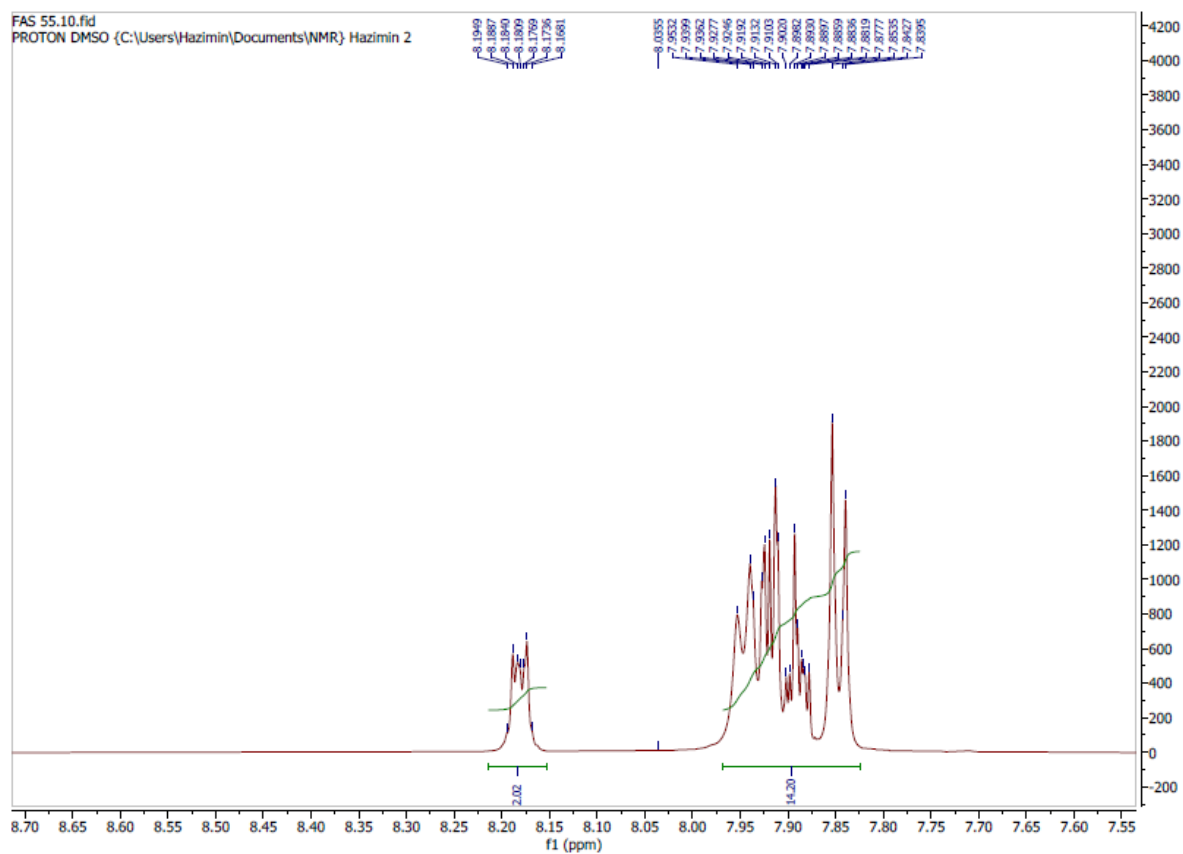

Expanded form of  $^1\text{H}$  NMR Spectrum of compound **12e** (region 7.80-8.25 ppm).

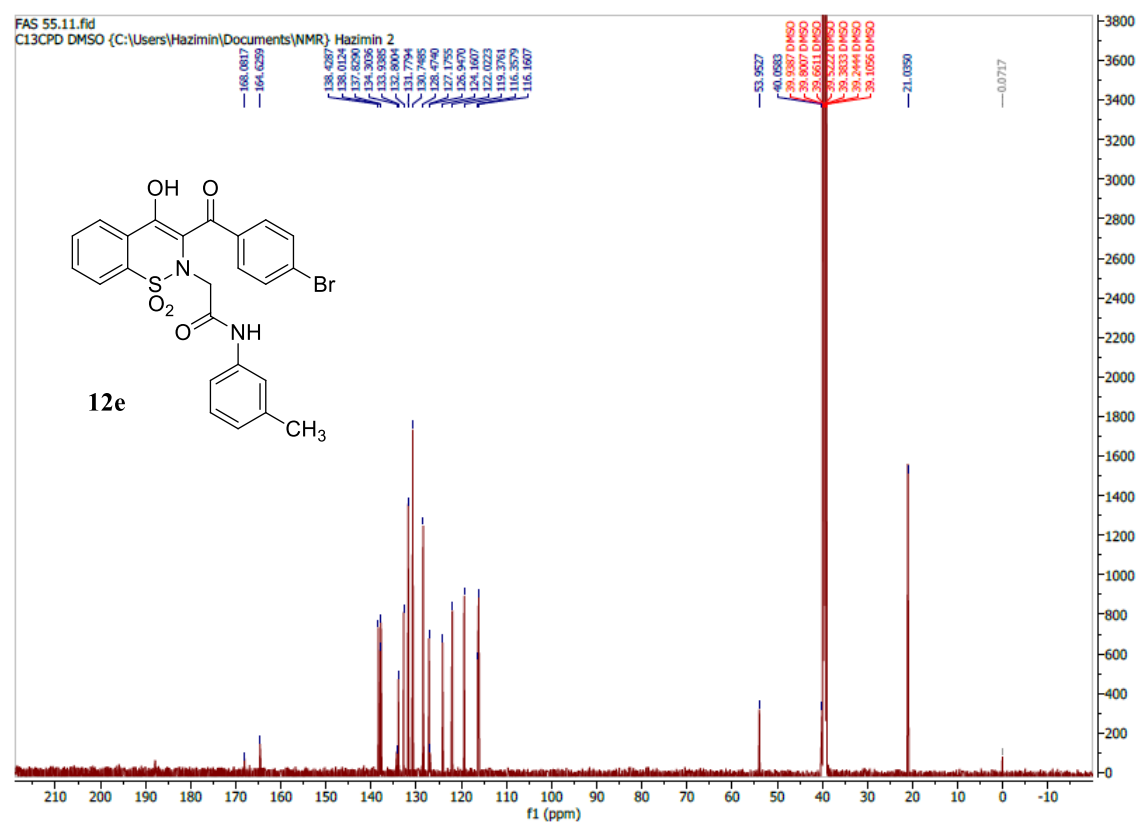

$^{13}\text{C}$  NMR Spectrum of compound **12e**.

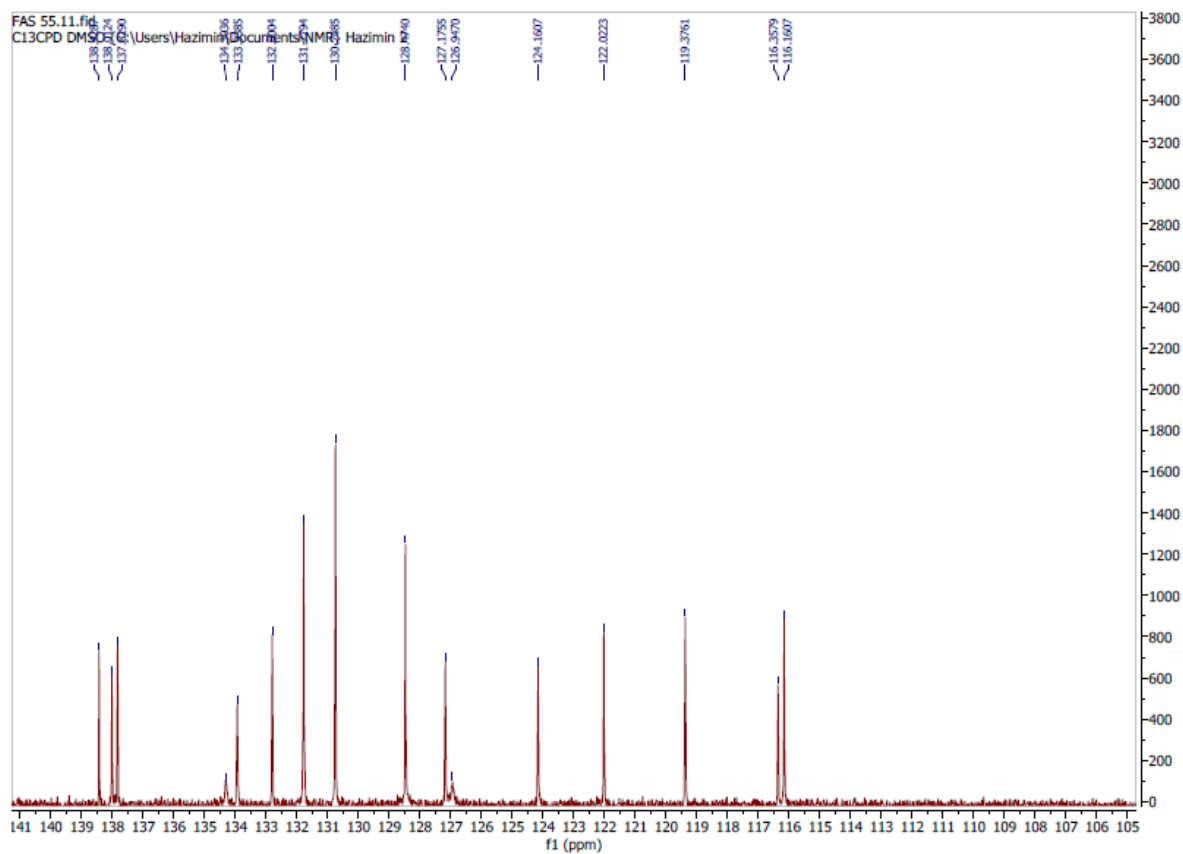

Expanded form of  $^{13}\text{C}$  NMR Spectrum of compound **12e** (region 116-139 ppm).

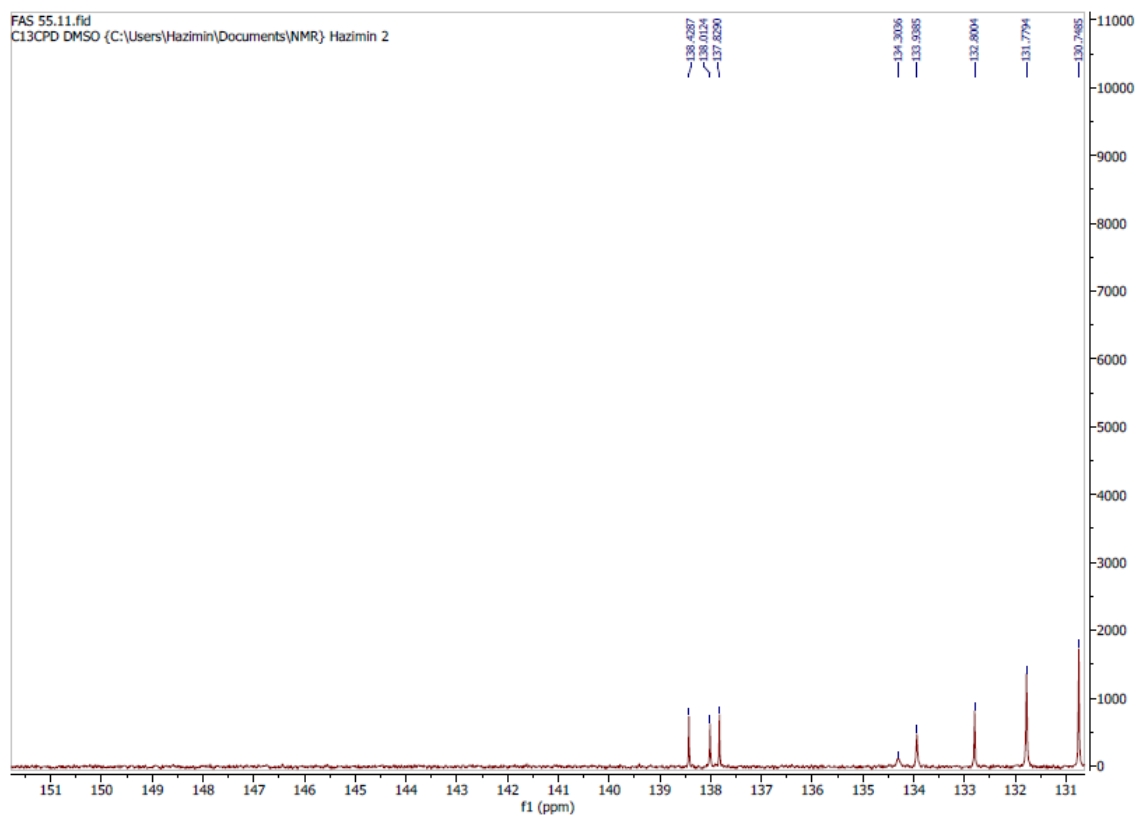

Expanded form of  $^{13}\text{C}$  NMR Spectrum of compound **12e** (region 130-139 ppm).

|               |          |             |          |                 |              |                       |                       |
|---------------|----------|-------------|----------|-----------------|--------------|-----------------------|-----------------------|
| SampleName    | FAS 55   | Position    | P1-A3    | Instrument Name | Instrument 1 | User Name             | DR SADI               |
| Inj Vol       | 5        | InjPosition |          | SampleType      | Sample       | IRM CalibrationStatus | All ions Missed       |
| Data Filename | FAS 55.d | Acq Method  | DrSadiam | Comment         |              | Acquired Time         | 4/27/2021 12:04:21 PM |

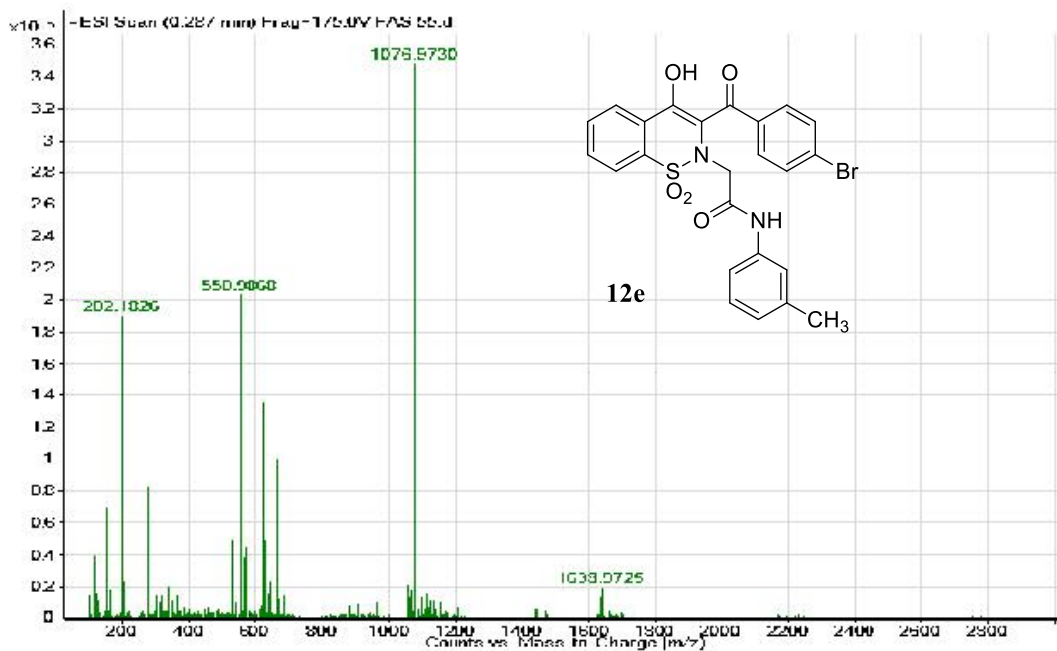

MS Spectrum of compound 12e.

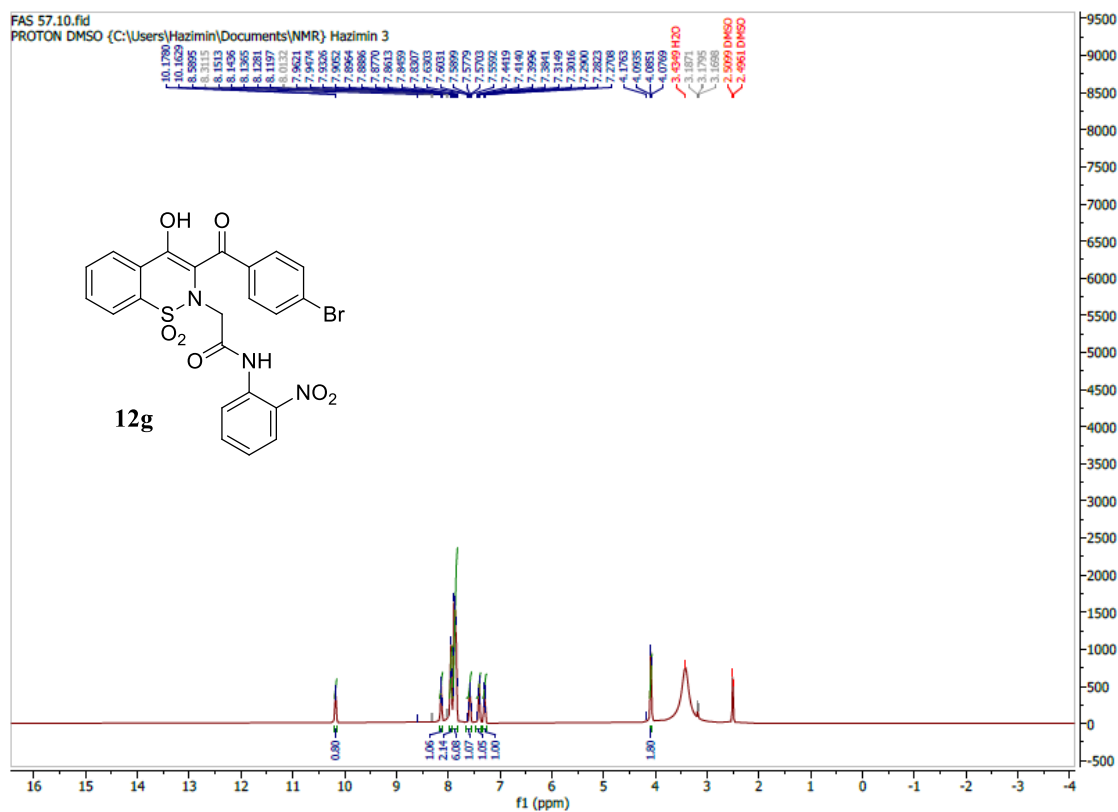

$^1\text{H}$  NMR Spectrum of compound 12g.



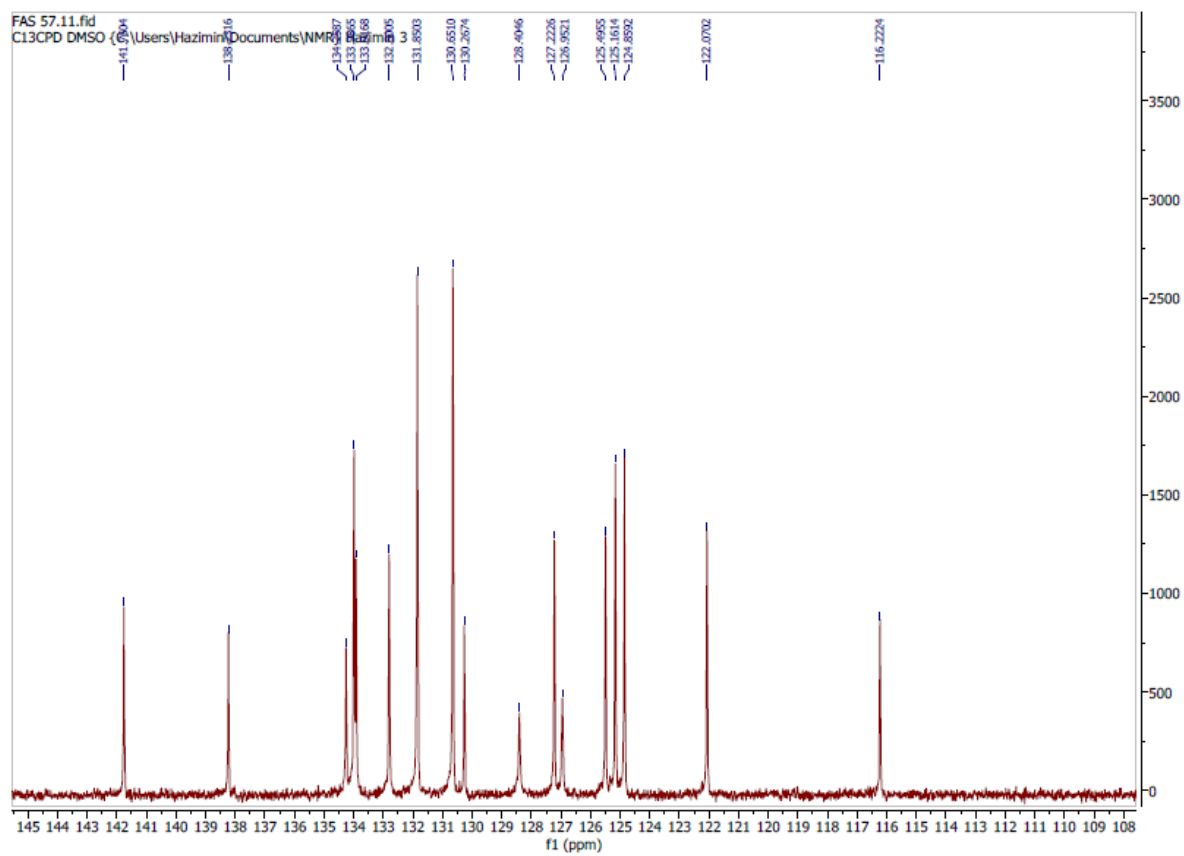

Expanded form of  $^{13}\text{C}$  NMR Spectrum of compound **12g** (region 116-142 ppm).

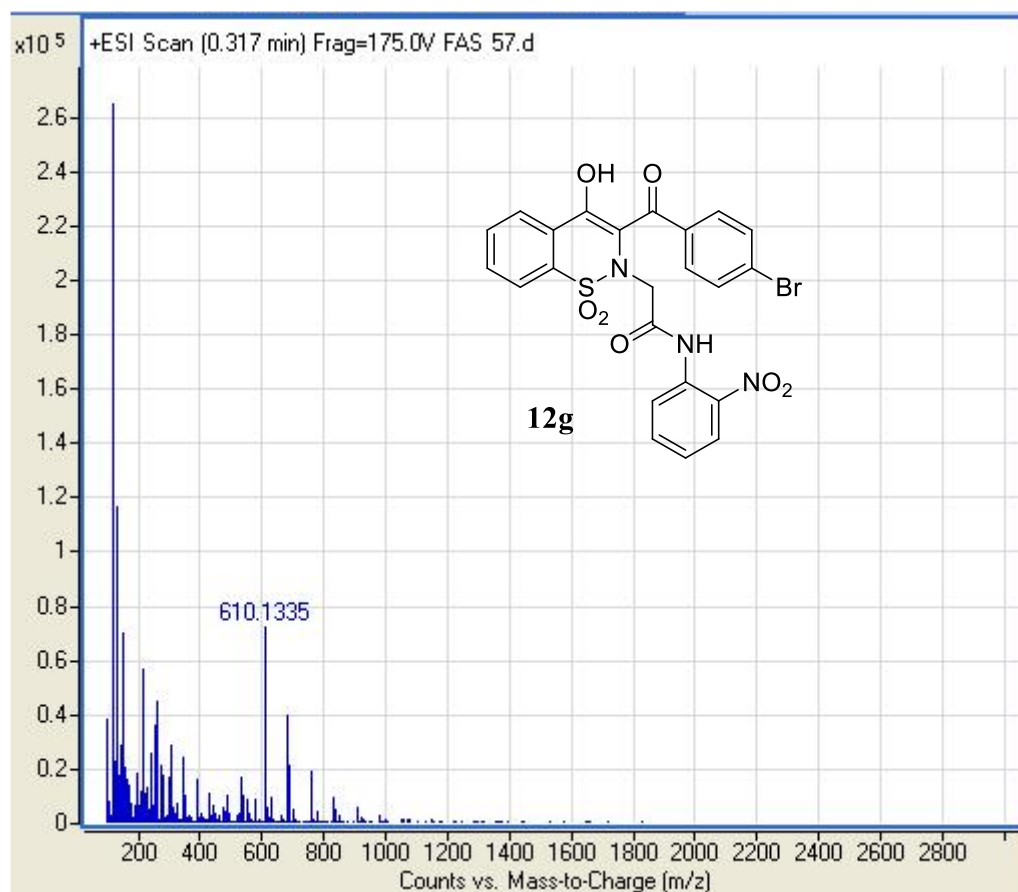

MS Spectrum of compound **12g**.





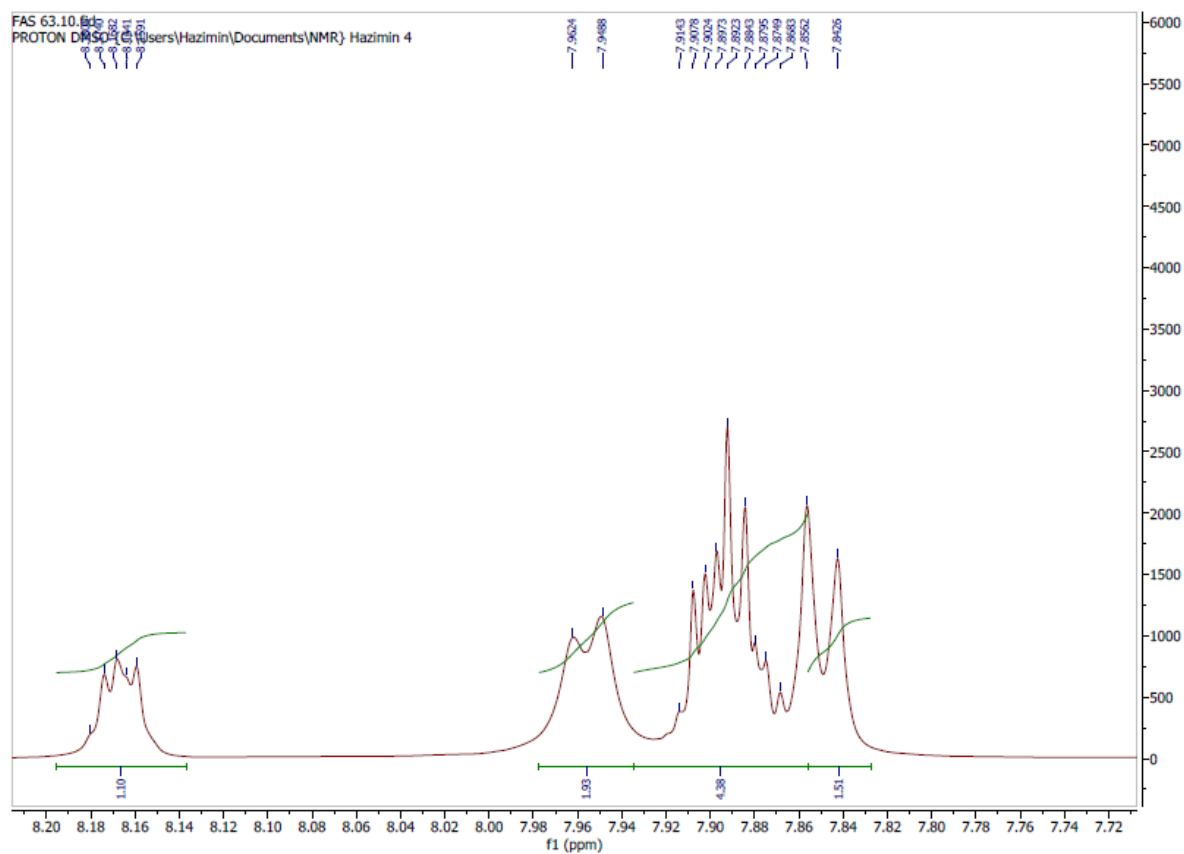

Expanded form of  $^1\text{H}$  NMR Spectrum of compound **12m** (region 7.82-8.20 ppm).

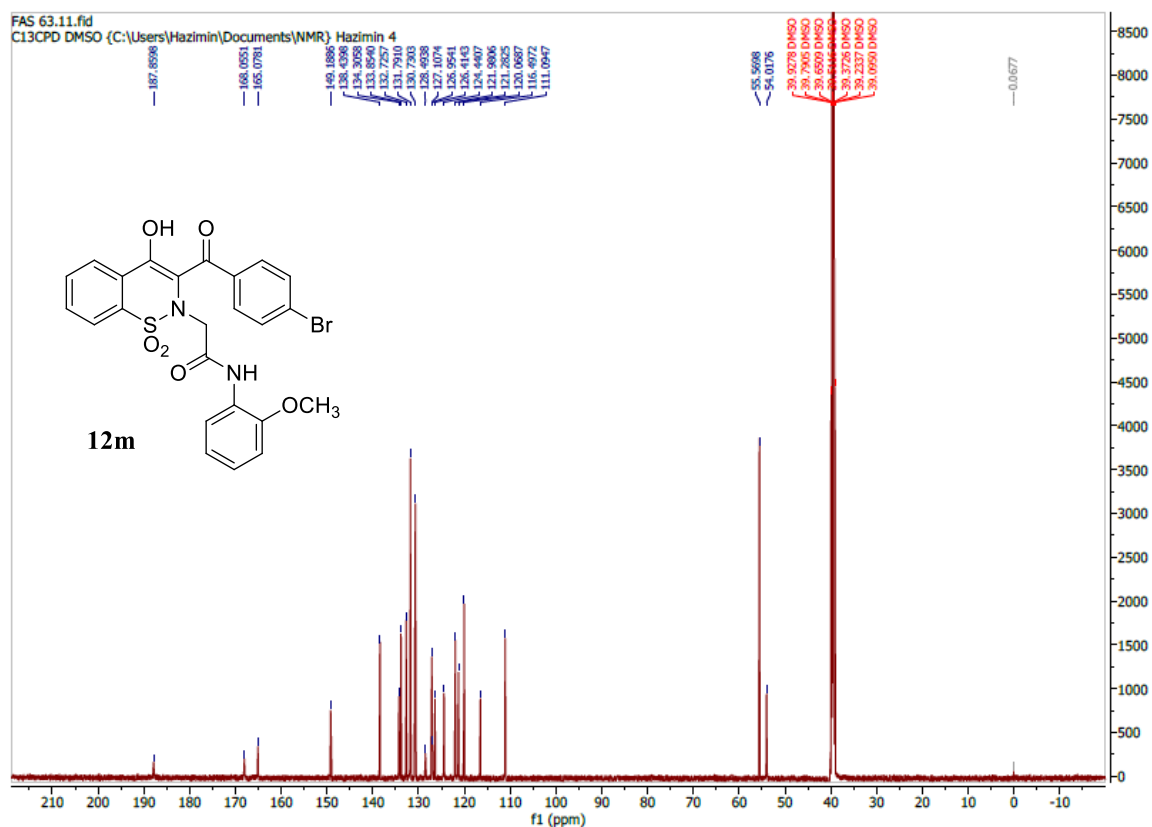

$^{13}\text{C}$  NMR Spectrum of compound **12m**.

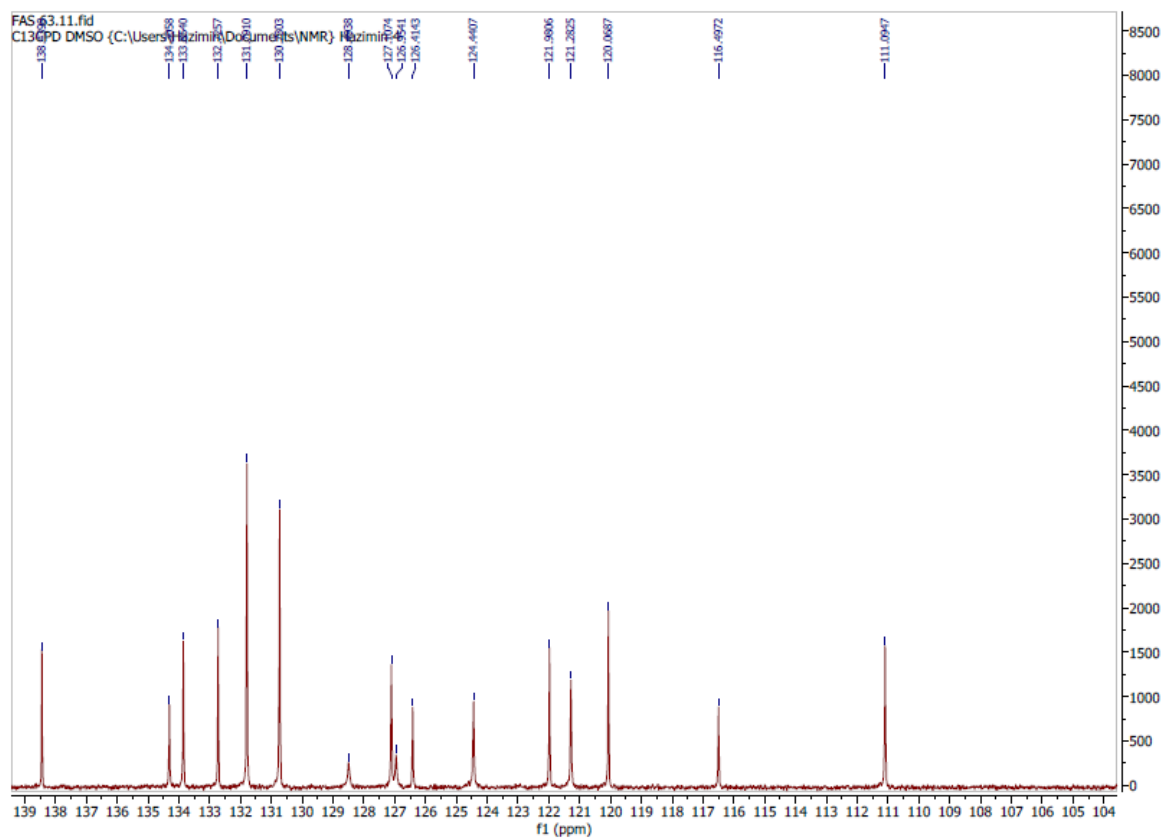

Expanded form of  $^{13}\text{C}$  NMR Spectrum of compound **12m** (region 110-139 ppm).

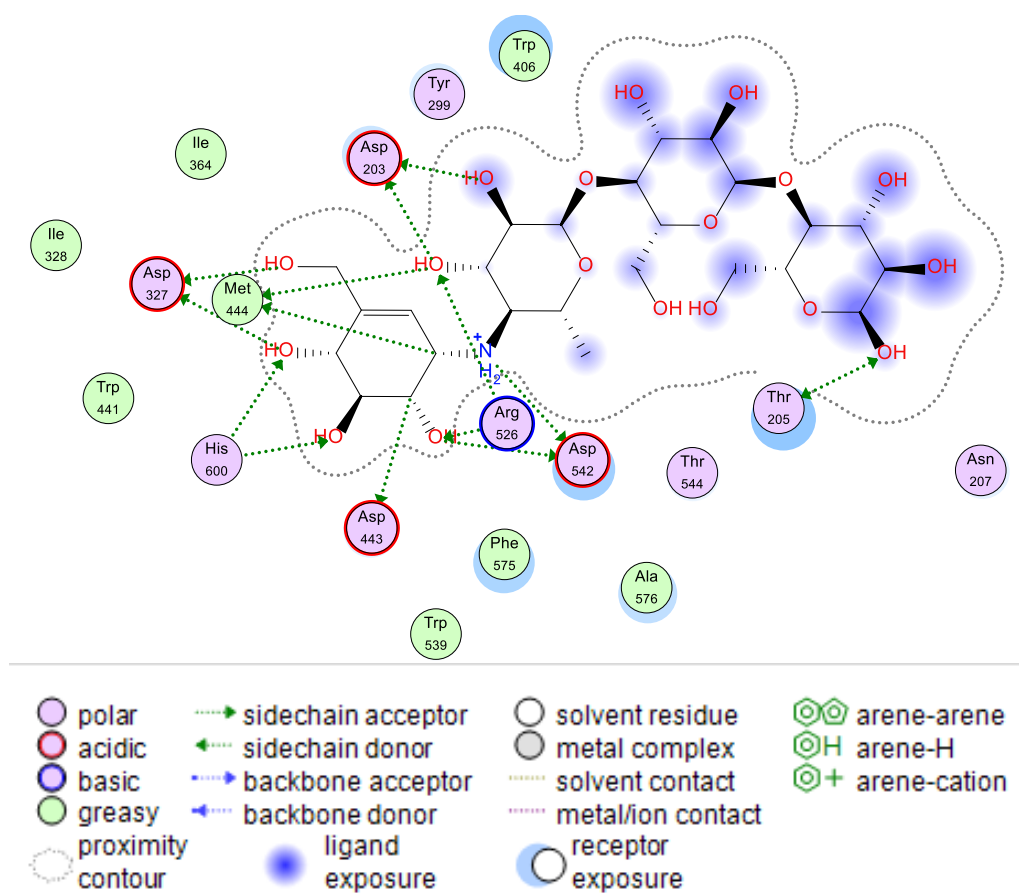

**Figure S1.** Selected (reference) residues. Computed acarbose interactions.

**Table S1.** 2D and 3D interaction modes of compounds **9a,b**; **11(a,b,d-m)** and **12(b,c,f,h-m)**. In 2D interaction modes the blue color indicates ligand exposure and green color dotted line indicates the interactions of receptor enzyme with ligands. In 3D interaction modes the colored portions show pocket selected and red portion indicates the ligand exposure points.

| Comp.     | 2D-interaction mods | 3D-maps |
|-----------|---------------------|---------|
| <b>9a</b> |                     |         |

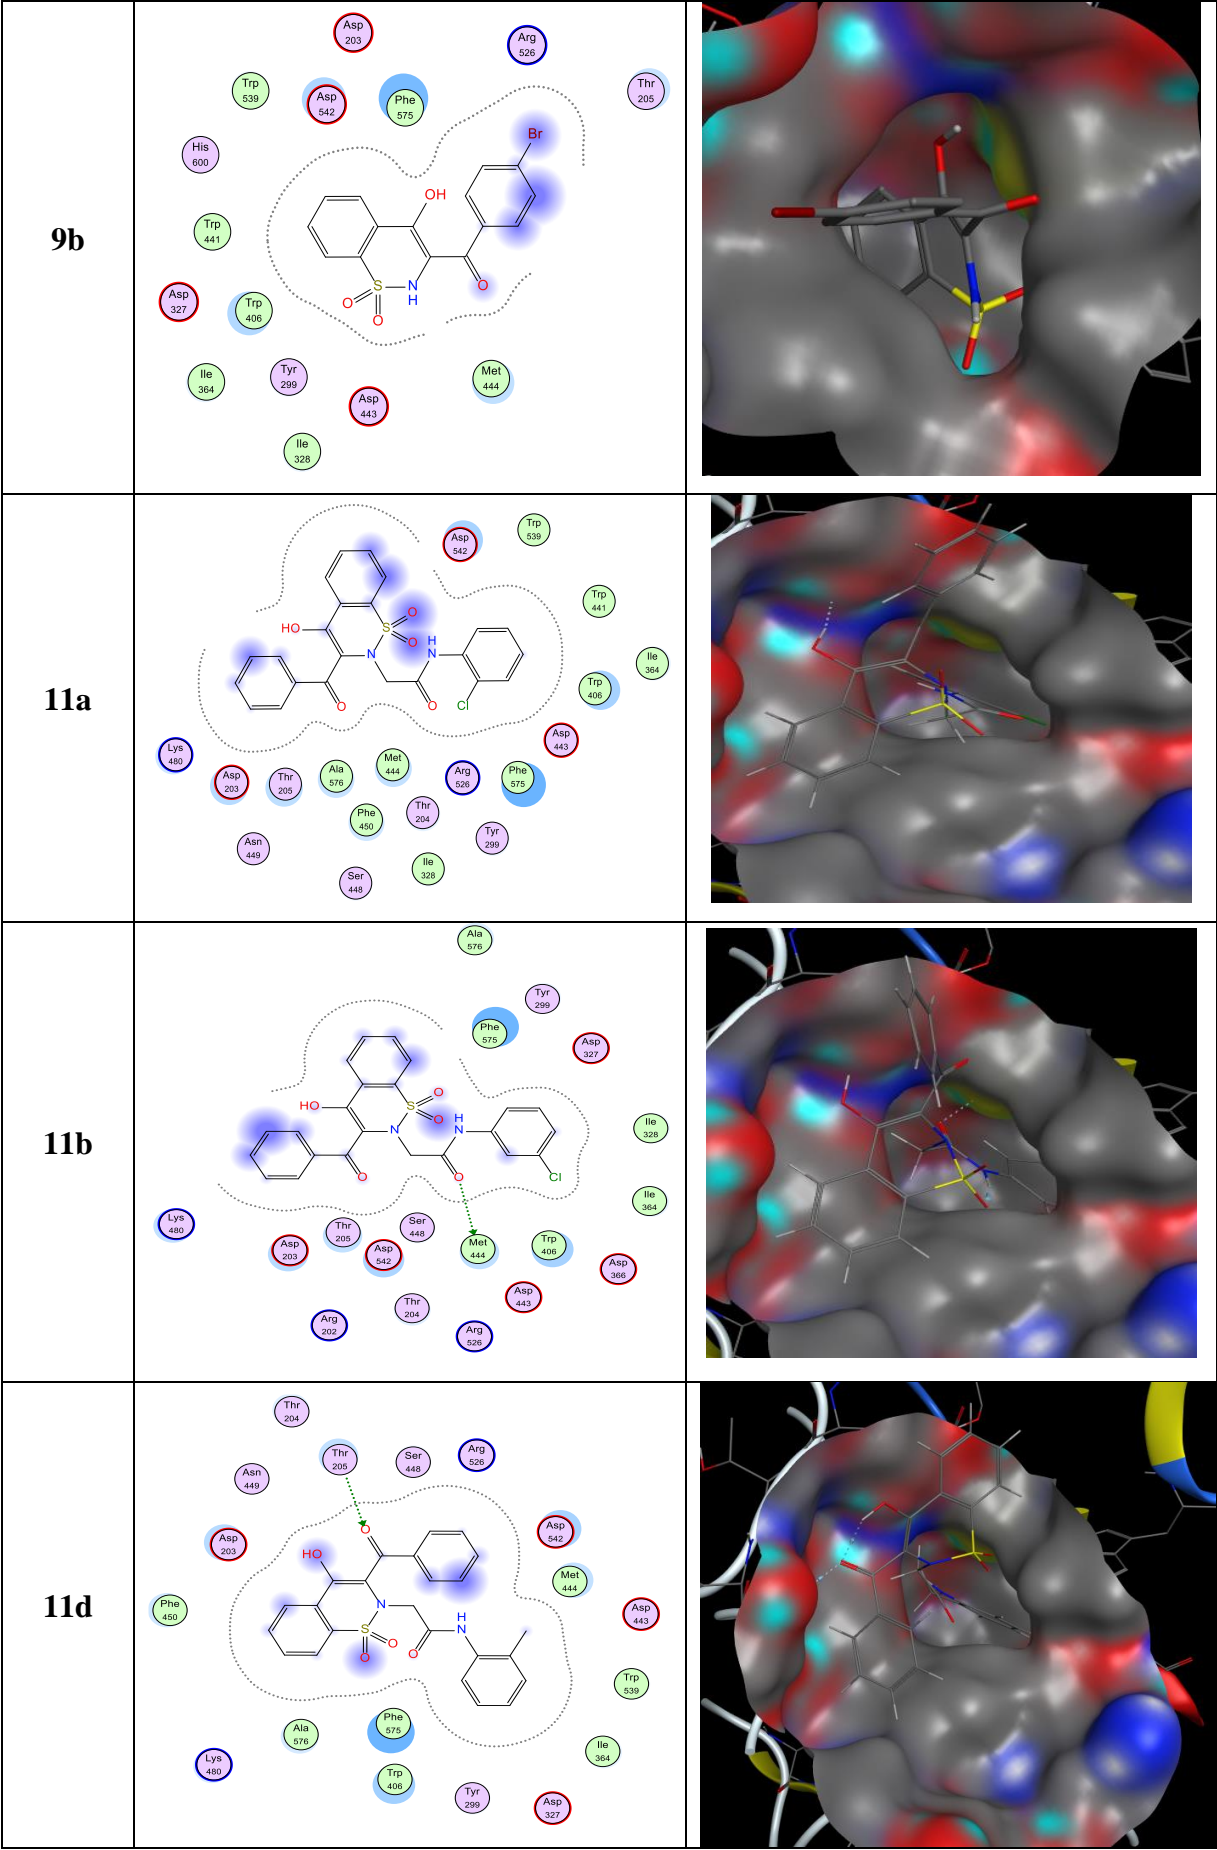

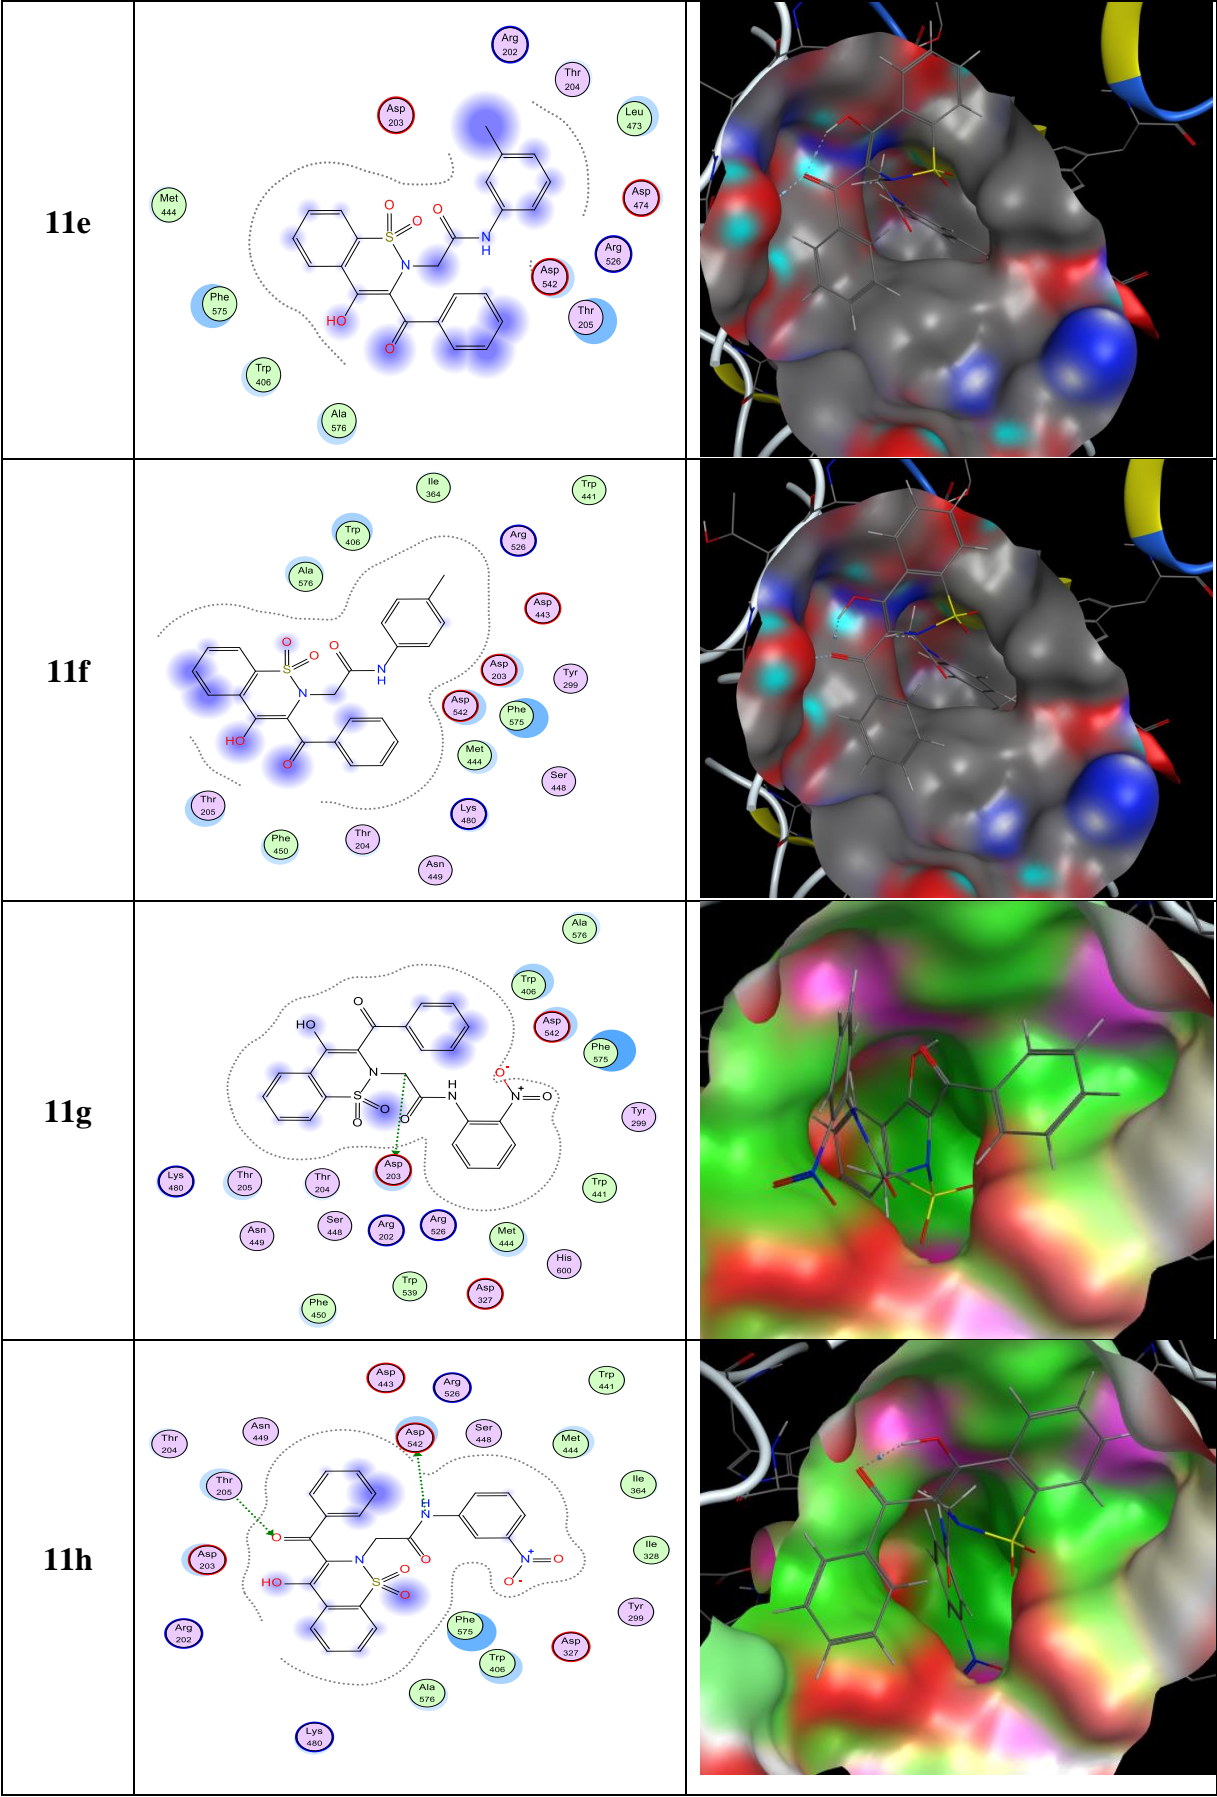



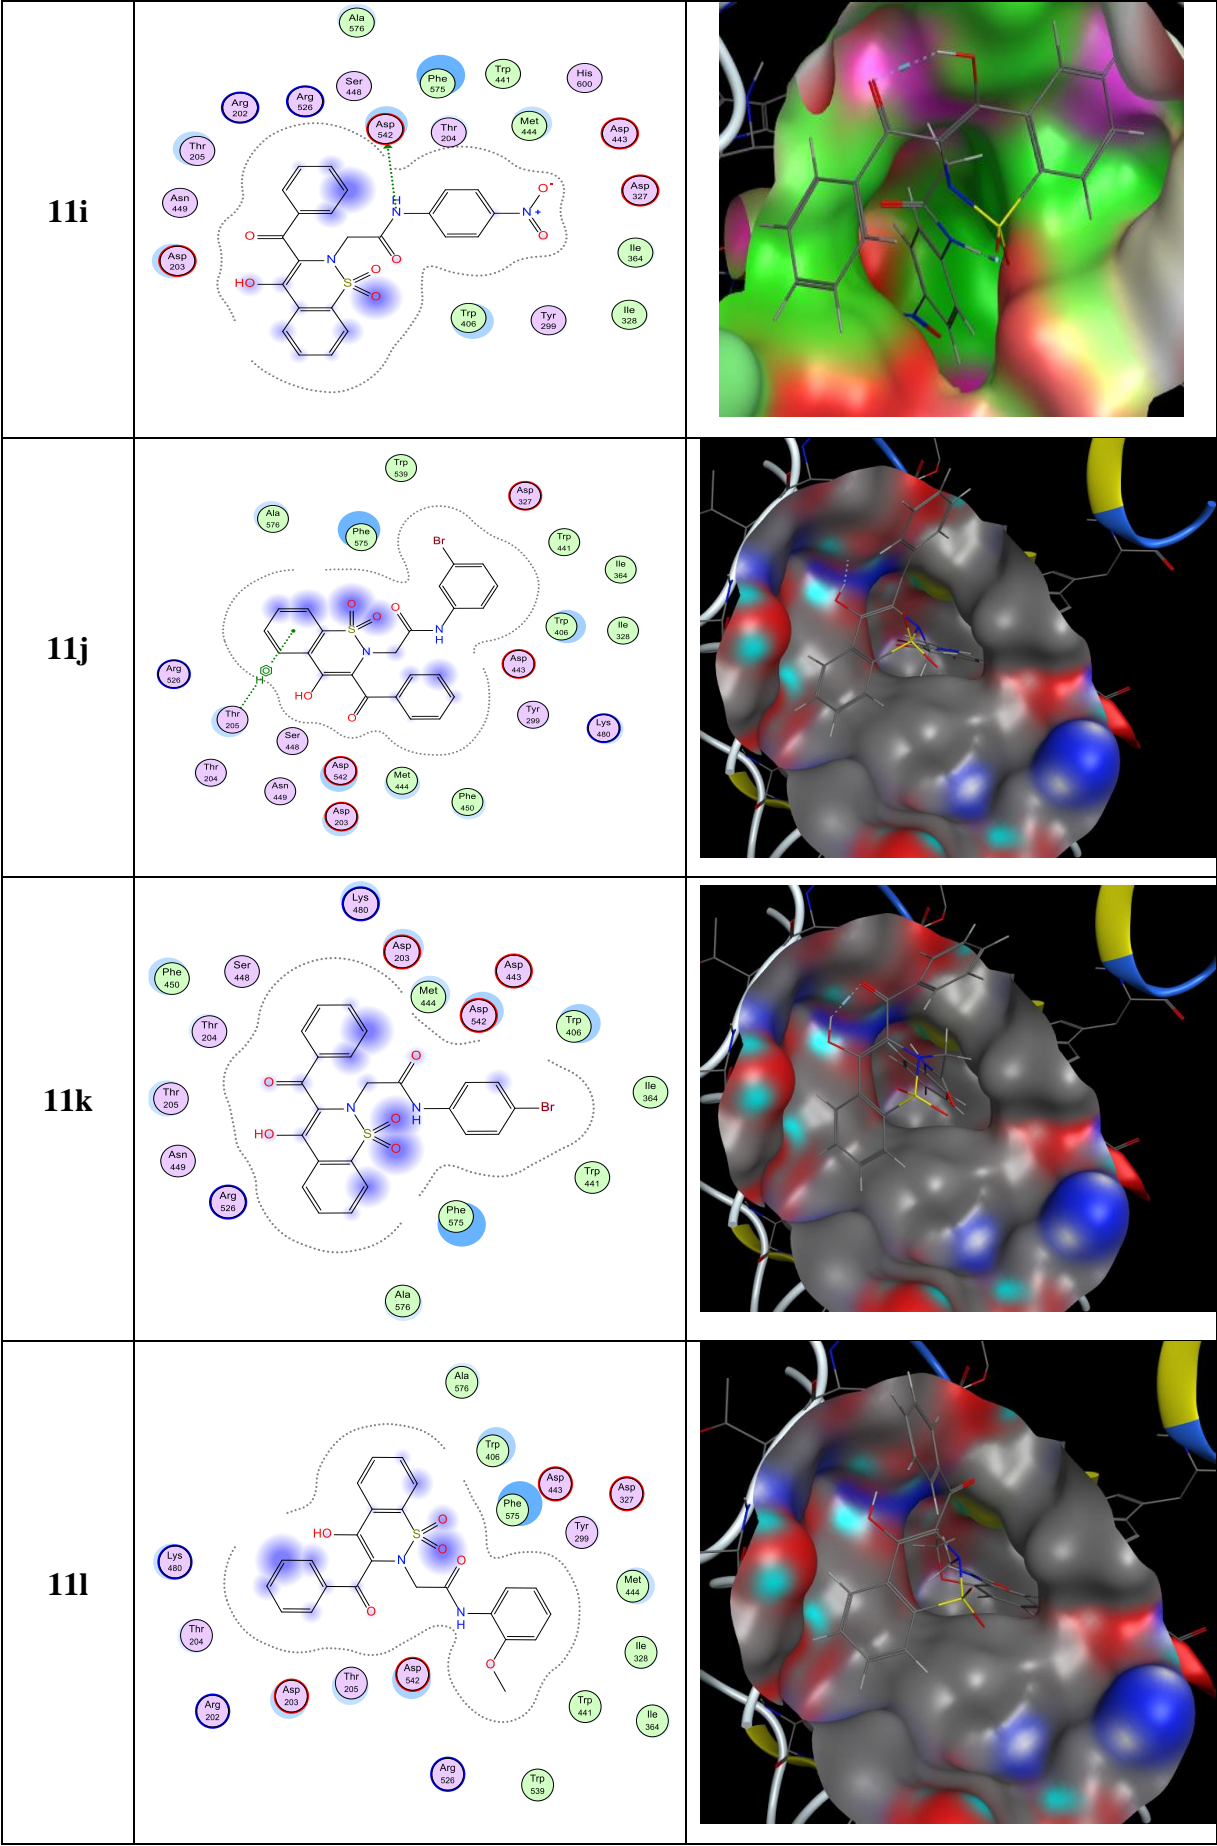

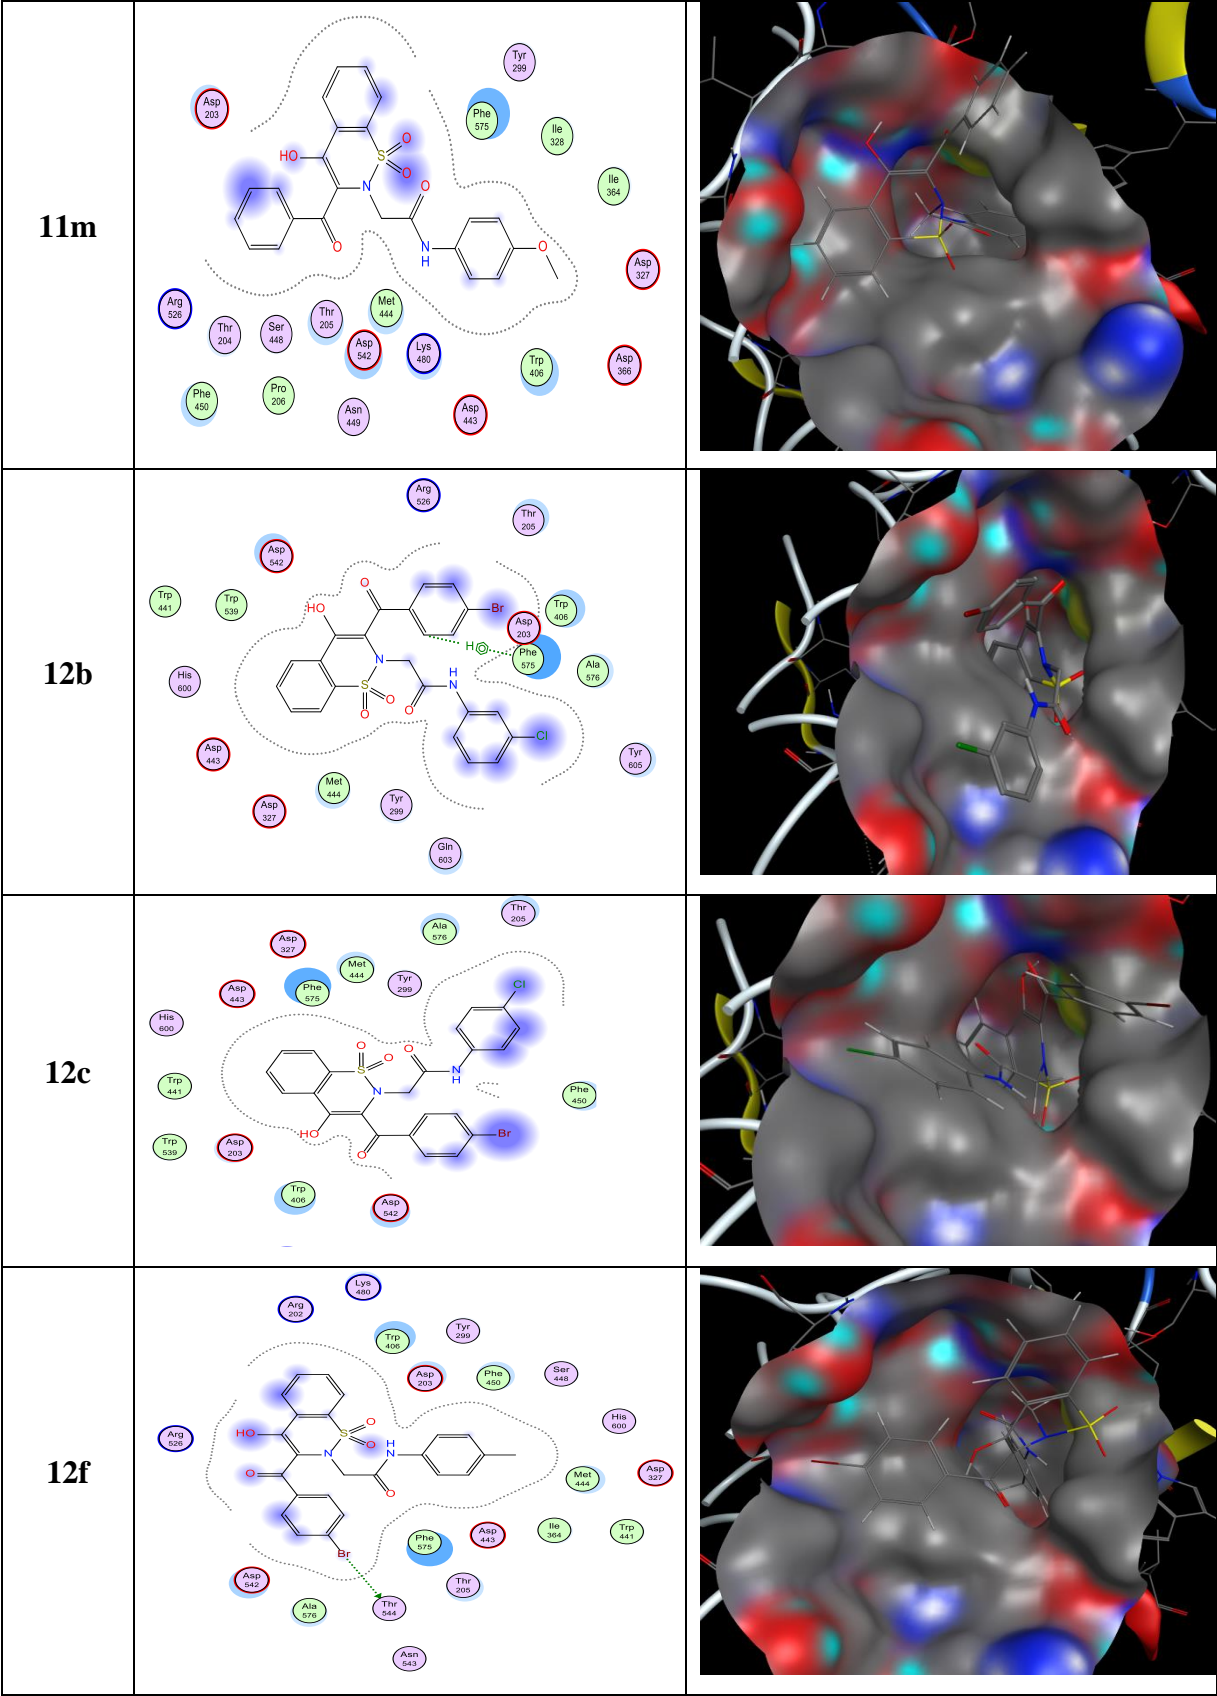



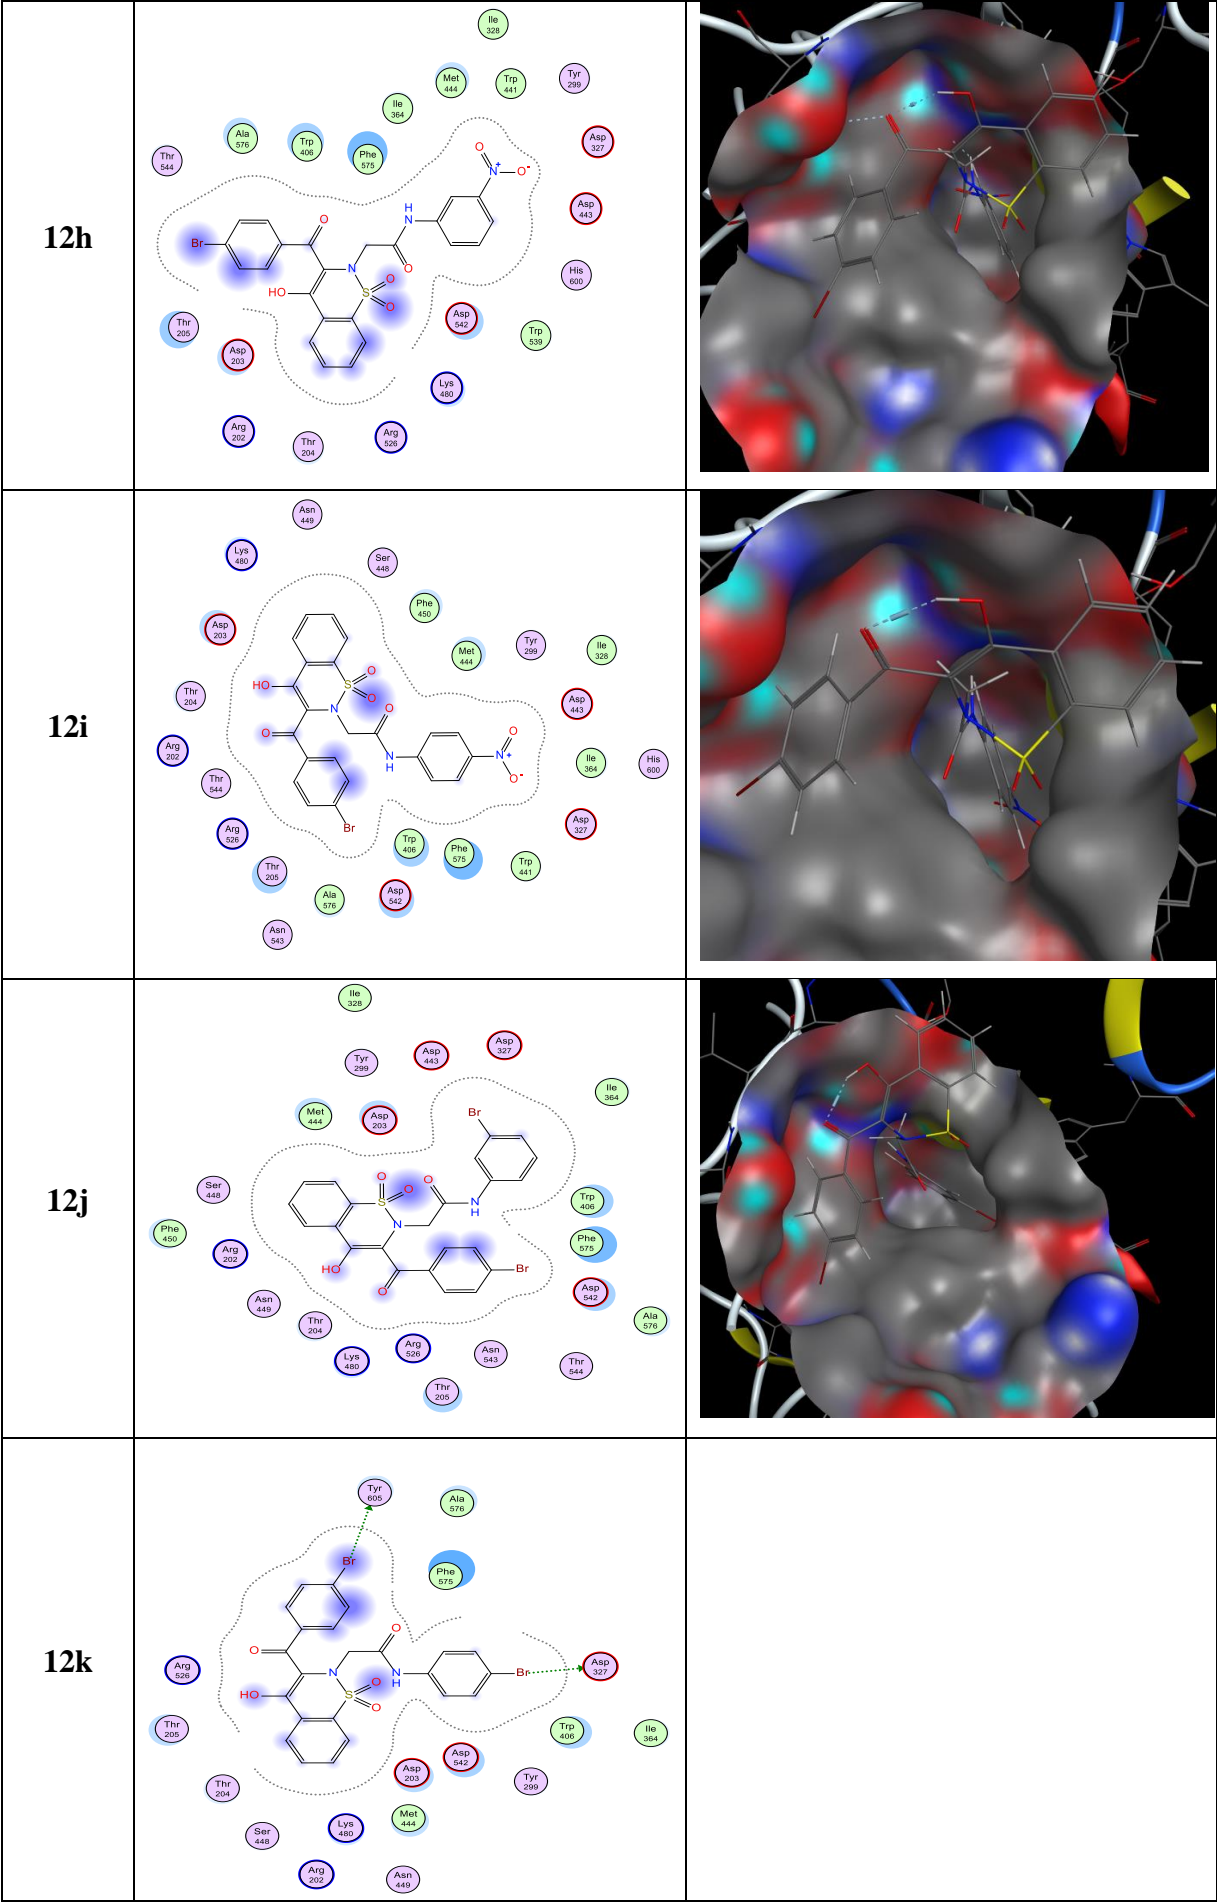

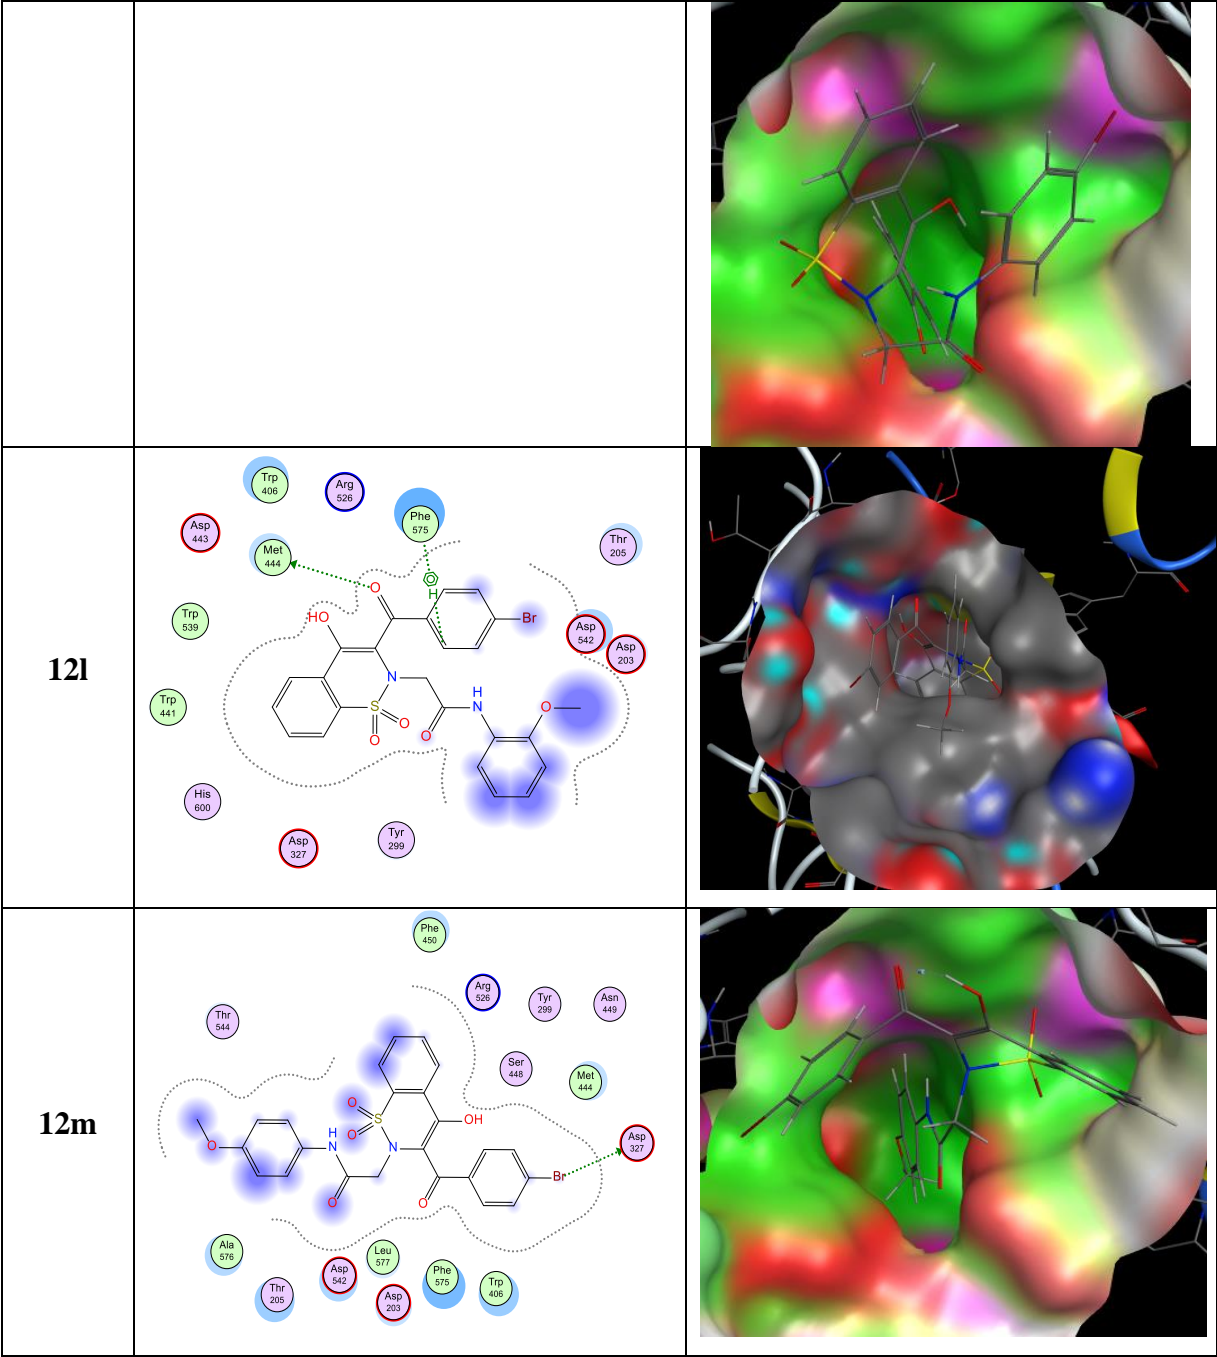

Supplement: s1 [file s1]
